# Supplementary material for: New VIVO-complexes for oxidative desulfurization of refractory sulfur compounds in fuel: synthesis, structure, reactivity trend and mechanistic studies
Source: Royal Society of Chemistry journal article supplement (doi:10.1039/c9dt02505g), 2019-01-01
Supplement: c9dt02505g1.pdf [file c9dt02505g1.pdf]

# **New V<sup>IV</sup>O-complexes for oxidative desulfurization of refractory sulfur compounds in fuel: synthesis, structure, reactivity trend and mechanistic studies**

Tendai O. Dembaremba,<sup>a,\*</sup> Isabel Correia,<sup>b</sup> Eric C. Hosten,<sup>a</sup> Maxim L. Kuznetsov,<sup>b</sup> Wilhelmus J. Gerber,<sup>c,\*</sup> João C. Pessoa<sup>b,\*</sup> Adeniyi S. Ogunlaja,<sup>a</sup> and Zenixole R. Tshentu <sup>a,\*</sup>

\*Corresponding authors

<sup>a</sup> Department of Chemistry, Nelson Mandela University, P.O. Box 77000, Port-Elizabeth 6031, South Africa.

Emails: [olsentodds@gmail.com](mailto:olsentodds@gmail.com) (T.O.D.) and [zenixole.tshentu@mandela.ac.za](mailto:zenixole.tshentu@mandela.ac.za) (Z.R.T.)

Tel: +27 415 042 074

<sup>b</sup> Centro de Química Estrutural, Instituto Superior Técnico, Universidade de Lisboa, Av. Rovisco Pais, 1049-001 Lisboa, Portugal.

Email: [joao.pessoa@ist.utl.pt](mailto:joao.pessoa@ist.utl.pt)

Tel: +351 218 419 268

<sup>c</sup> Department of Chemistry and Polymer Science, Stellenbosch University, Private Bag X1, Stellenbosch 7602, Western Cape, South Africa.

Email: [wgerber@sun.ac.za](mailto:wgerber@sun.ac.za)

Tel: +27 218 082 699

## Supplementary information

### 1. Synthesis methods

#### 1.1. Preparation of the ligands

The ligand precursors; HPIMX, X = -H, -Br, -OMe and -NO<sub>2</sub>, were prepared by modifying a procedure reported in literature by Gerber *et al.*<sup>58</sup> for related substituted imidazoles. 0.02 mol. of starting material [3.7 g salicylaldehyde for 2'-(2-hydroxyphenyl)imidazole (HPIMH), 4.0 g 5-bromosalicylaldehyde for 2'-(2-hydroxy-5-bromophenyl)imidazole (HPIMBr), 3.0 g 2-hydroxy-5-methoxybenzaldehyde for 2'-(2-hydroxy-5-methoxyphenyl)imidazole (HPIMMeO) and 3.3 g 2-hydroxy-5-nitrobenzaldehyde for 2'-(2-hydroxy-5-nitrophenyl)imidazole (HPIMNO<sub>2</sub>)] in 25 mL ethanol (except in the case of HPIMNO<sub>2</sub> where DMSO was used) was mixed with 5.0 mL of a 40 % aqueous glyoxal solution at 0°C. 10.0 mL of an ice-cold 25 % aqueous ammonia solution was added and stirred for 30 minutes at 0 °C. The yellow-brown mixtures were then stirred overnight at room temperature. For HPIMBr and HPIMNO<sub>2</sub> the precipitate formed was filtered off and washed with water. For HPIMH and HPIMMeO, ethanol was removed using a rotary evaporator and the ligands were extracted from the residue several times using 20 mL aliquots of diethyl ether. The diethyl ether was then removed using a rotary evaporator and the oil obtained was recrystallized from ethyl acetate to afford pure crystals of the ligands.

#### (a) 2'-(2-Hydroxyphenyl)imidazole (HPIMH)

Yield: 72%. FT-IR: 1554 cm<sup>-1</sup>,  $\nu$  (C=N) and 1264 cm<sup>-1</sup>, phenolic  $\nu$  (C-O). <sup>1</sup>H NMR (300 MHz, CDCl<sub>3</sub>)  $\delta$  7.75 (s, 1H), 7.63 (d, 1H), 7.24 (t, 1H), 7.12 (s, 2H), 7.07 (d, 1H), 6.86 (t, 1H), 5.73 (s,

1H). CHNS Analysis, expected (found) for C<sub>9</sub>H<sub>8</sub>N<sub>2</sub>O (%): C, 67.49 (67.43); H, 5.03 (5.07); N, 17.49 (17.51).

**(b) 2'-(2-Hydroxy-5-bromophenyl)imidazole (HPIMBr)**

Yield: 83%. FT-IR: 1528 cm<sup>-1</sup>, ν (C=N) and 1248 cm<sup>-1</sup>, phenolic ν (C-O). 1H NMR (300 MHz, DMSO) δ 12.44 (s, 1H), 8.09 (s, 1H), 7.37 (dd, 1H), 7.28 (s, 2H), 7.07 (s, 1H), 6.91 (d, 1H). CHNS Analysis, expected (found) for C<sub>9</sub>H<sub>7</sub>BrN<sub>2</sub>O (%): C, 45.22 (45.26); H, 2.95 (2.91); N, 11.72 (11.75).

**(c) 2'-(2-Hydroxy-5-methoxyphenyl)imidazole (HPIMMeO)**

Yield: 63%. FT-IR: 1532 cm<sup>-1</sup>, ν (C=N) and 1219 cm<sup>-1</sup>, phenolic ν (C-O). 1H NMR (300 MHz, CDCl<sub>3</sub>) δ 7.19 (s, 1H), 7.08 (s, 1H), 7.05 (s, 1H), 7.02 (s, 2H), 6.91 (s, 1H), 6.89 (s, 1H), 6.75 (d, 2H), 3.63 (s, 3H). CHNS Analysis, expected (found) for C<sub>10</sub>H<sub>10</sub>N<sub>2</sub>O<sub>2</sub> (%): C, 63.15 (63.19); H, 5.30 (5.33); N, 14.73 (14.78).

**(d) 2'-(2-Hydroxy-5-nitrophenyl)imidazole (HPIMNO<sub>2</sub>)**

Yield: 88%. FT-IR: 1560 cm<sup>-1</sup>, ν (C=N) and 1300 cm<sup>-1</sup>, phenolic ν (C-O). 1H NMR (300 MHz, DMSO) δ 13.88 (s, 1H), 8.93 (s, 1H), 8.11 (d, 1H), 7.35 (s, 2H), 7.07 (d, 1H). CHNS Analysis, expected (found) for C<sub>9</sub>H<sub>7</sub>N<sub>3</sub>O<sub>3</sub> (%): C, 52.69 (52.72); H, 3.44 (3.43); N, 20.48 (20.46).

**1.2. Preparation of complexes**

Complexes were prepared from their ligand precursors adapting literature techniques used for similar *bis*-coordinated complexes.<sup>59</sup> To a solution of each ligand precursor in methanol (except in the case of HPIMNO<sub>2</sub> where DMSO was used) a solution of two-fold molar quantity of

$V^{IV}OSO_4$  in water was added. Precipitates were formed immediately. These were filtered off and washed with a methanolic solution and allowed to dry to yield their respective complexes.

**(a) Oxidovanadium(IV)-2'-(2-hydroxyphenyl)imidazole [ $V^{IV}O(PIMH)_2$ ]**

Yield: 62%. FT- IR ( $\nu$ ,  $cm^{-1}$ ): 1563,  $\nu(C=N)$ ; 1148,  $\nu(C-O)$ ; 964,  $\nu(V=O)$ ; 446,  $\nu(V-N)$  and 409,  $\nu(V-O)$ . CHNS Analysis, expected (found) for  $C_{18}H_{14}N_4O_3V$  (%): C, 56.26 (56.21); H, 3.41 (3.45); N, 14.58 (14.52).

**(b) Oxidovanadium(IV)-2'-(2-hydroxyphenyl)imidazole [ $V^{IV}O(PIMMeO)_2$ ]**

Yield: 56%. FT- IR ( $\nu$ ,  $cm^{-1}$ ): 1570,  $\nu(C=N)$ ; 1099,  $\nu(C-O)$ ; 944,  $\nu(V=O)$ ; 466,  $\nu(V-N)$  and 430,  $\nu(V-O)$ . CHNS Analysis, expected (found) for  $C_{20}H_{18}N_4O_5V$  (%): C, 54.06 (53.98); H, 3.86 (3.87); N, 12.61 (12.58).

**(c) Oxidovanadium(IV)-2'-(2-hydroxyphenyl)imidazole [ $V^{IV}O(PIMBr)_2$ ]**

Yield: 69%. FT- IR ( $\nu$ ,  $cm^{-1}$ ): 1563,  $\nu(C=N)$ ; 1107,  $\nu(C-O)$ ; 973,  $\nu(V=O)$ ; 464,  $\nu(V-N)$  and 421,  $\nu(V-O)$ . CHNS Analysis, expected (found) for  $C_{18}H_{12}Br_2N_4O_3V$  (%): C, 39.88 (39.84); H, 2.05 (2.07); N, 10.34 (10.32).

**(d) Oxidovanadium(IV)-2'-(2-hydroxyphenyl)imidazole [ $V^{IV}O(PIMNO_2)_2$ ]**

Yield: 76%. FT- IR ( $\nu$ ,  $cm^{-1}$ ): 1560,  $\nu(C=N)$ ; 1148,  $\nu(C-O)$ ; 992,  $\nu(V=O)$ ; 482,  $\nu(V-N)$  and 421,  $\nu(V-O)$ . CHNS Analysis, expected (found) for  $C_{18}H_{12}N_6O_7V$  (%): C, 45.59 (45.59); H, 2.34 (2.40); N, 17.72 (17.68).

## 2. Computational details

The entropic term in solution ( $S_s$ ) was calculated according to the procedure described by Wertz<sup>67</sup> and Cooper and Ziegler<sup>68</sup> using **Equations 1 to 6**:

$$\Delta S_1 = R \ln V_{m,liq}^s / V_{m,gas} \quad (1)$$

$$\Delta S_2 = R \ln V_m^{\square} / V_{m,liq}^s \quad (2)$$

$$\alpha = \frac{S_{liq}^{\square} - (S_{gas}^{\square} + R \ln V_{m,liq}^s / V_{m,gas}^s)}{(S_{gas}^{\square} + R \ln V_{m,liq}^s / V_{m,gas}^s)} \quad (3)$$

$$S_s = S_g + \otimes S_{sol} = S_g + [\otimes S_1 + \langle (S_g + \otimes S_1) + \otimes S_2 \rangle =$$

$$S_g + [(-12.72 \text{ cal/mol}\cdot\text{K}) - 0.32(S_g - 12.72 \text{ cal/mol}\cdot\text{K}) + 6.37 \text{ cal/mol}\cdot\text{K}] \quad (\text{CH}_3\text{OH}) \quad (4)$$

$$S_g + [(-12.21 \text{ cal/mol}\cdot\text{K}) - 0.23(S_g - 12.21 \text{ cal/mol}\cdot\text{K}) + 5.87 \text{ cal/mol}\cdot\text{K}] \quad (\text{CH}_3\text{CN}) \quad (5)$$

$$S_g + [(-10.16 \text{ cal/mol}\cdot\text{K}) - 0.15(S_g - 10.16 \text{ cal/mol}\cdot\text{K}) + 3.81 \text{ cal/mol}\cdot\text{K}] \quad (\text{heptane}) \quad (6)$$

where  $S_g$  is the gas-phase entropy of the solute,  $\Delta S_{sol}$  is the solvation entropy,  $S^{\circ,s,liq}$ ,  $S^{\circ,s,gas}$  and  $V_{m,liq}^s$  are the standard entropies and molar volumes of the solvent in the liquid or gas phases (127.2/149.6/328.57 and 239.9/245.5/427.98 J/mol $\cdot$ K and 40.46/52.16/146.51 mL/mol, respectively, for methanol/acetonitrile/heptane),  $V_{m,gas}$  is the molar volume of the ideal gas at 25 °C (24450 mL/mol),  $V_m^{\circ}$  is the molar volume of the solution that correspond to the standard conditions (1000 mL/mol). The enthalpies and Gibbs free energies in solution ( $H_s$  and  $G_s$ , respectively) were estimated using the **Equations 7 and 8**:

$$H_s = E_s(6-311+G^*) + H_g(6-31G^*) - E_g(6-31G^*) \quad (7)$$

$$G_s = H_s - TS_s \quad (8)$$

where  $E_s$  and  $E_g$  are the total energies in solution and the gas phase and  $H_g$  is the gas-phase enthalpy calculated at the corresponding level.

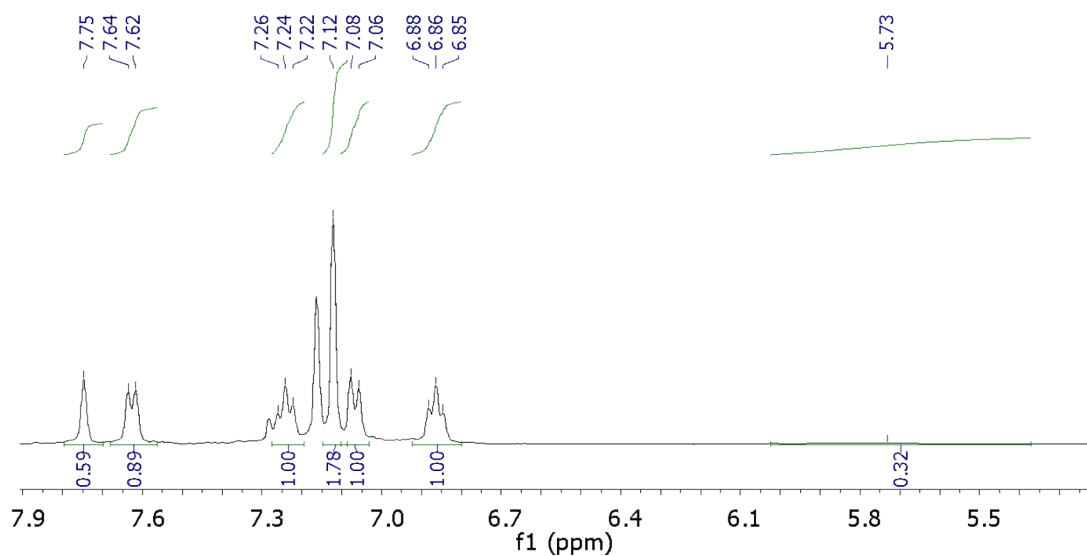

**Figure S1.**  $^1\text{H}$  NMR of 2'-(2-hydroxyphenyl)imidazole (HPIMH).

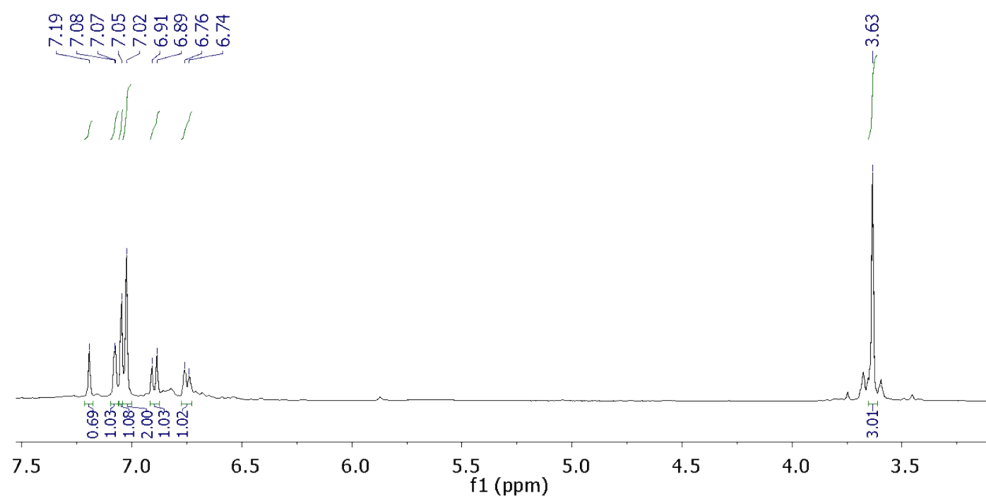

**Figure S2.**  $^1\text{H}$  NMR of 2'-(2-hydroxy-5-methoxyphenyl)imidazole (HPIMMeO).

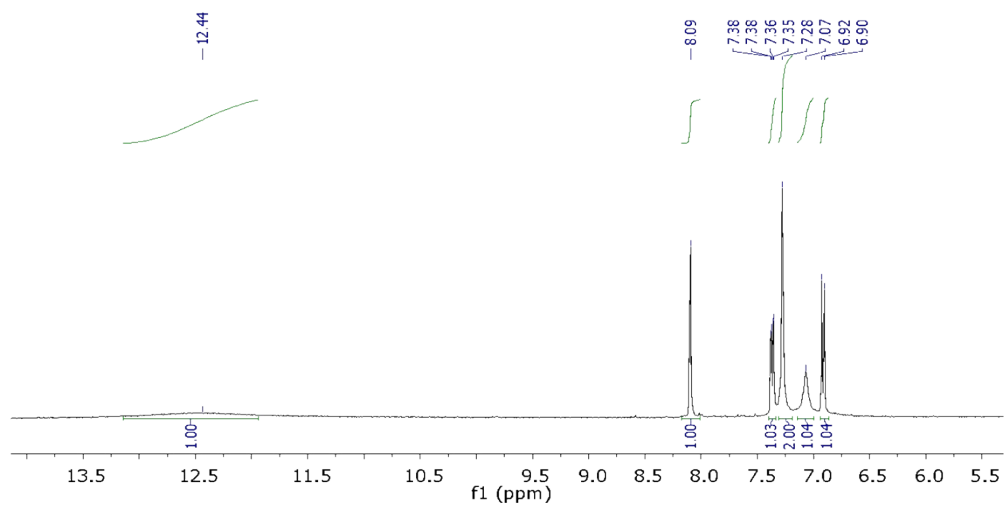

**Figure S3.**  $^1\text{H}$  NMR of 2'-(2-hydroxy-5-bromophenyl)imidazole (HPIMBr).

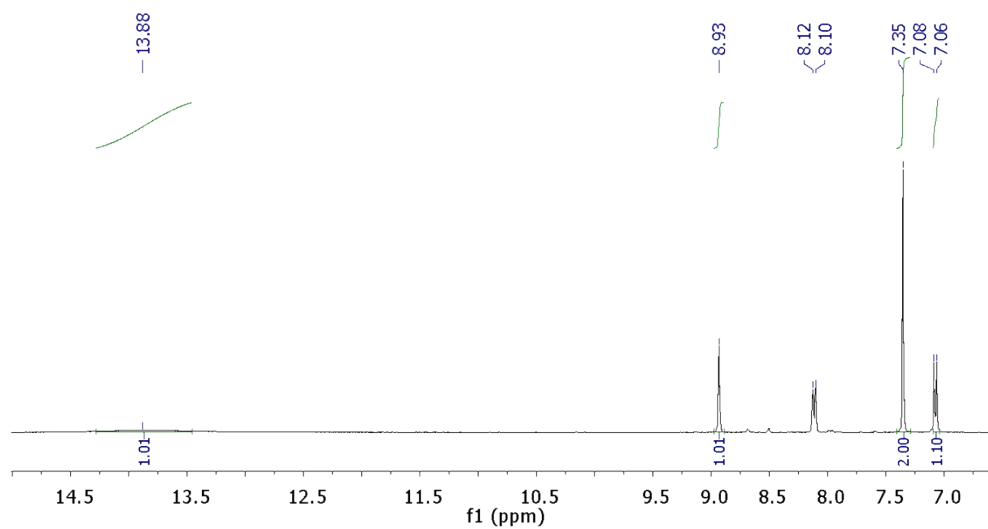

**Figure S4.**  $^1\text{H}$  NMR of 2'-(2-hydroxy-5-nitrophenyl)imidazole (HPIMNO<sub>2</sub>).

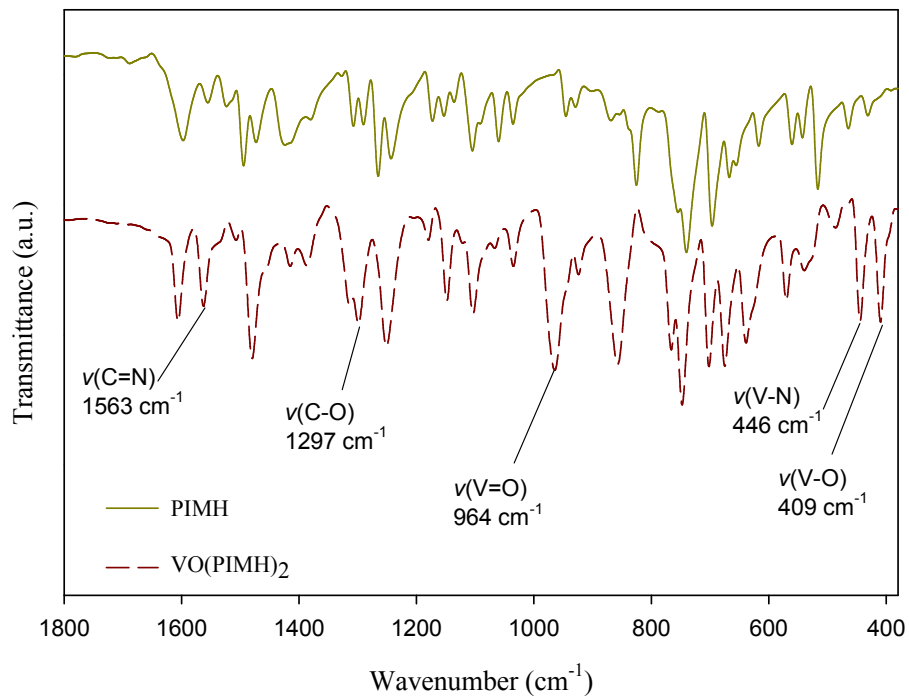

**Figure S5.** FT-IR spectra of HPIMH and its complex [V<sup>IV</sup>O(PIMH)<sub>2</sub>].

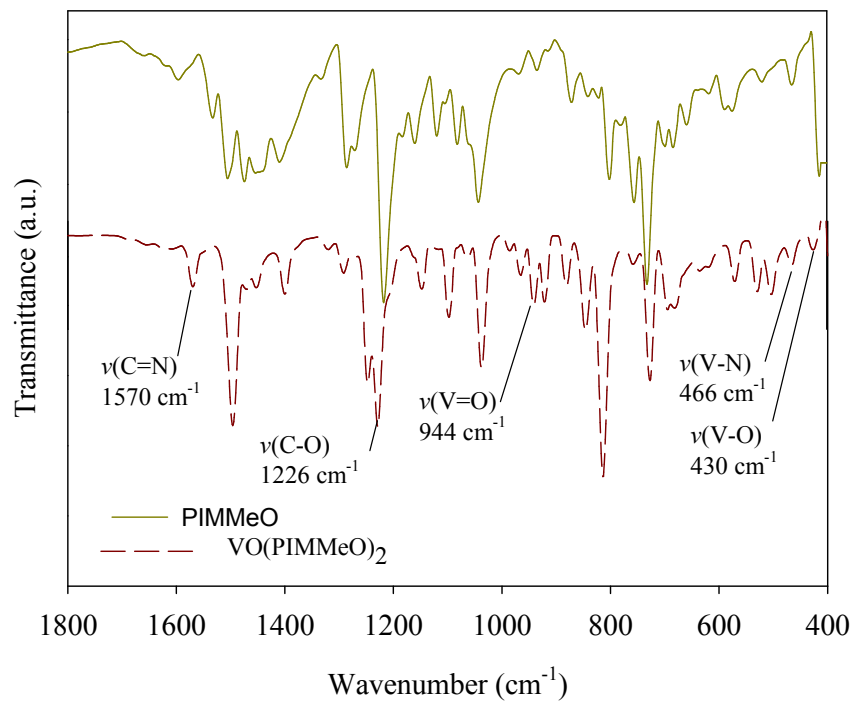

**Figure S6.** FT-IR spectra of HPIMMeO and its complex [V<sup>IV</sup>O(PIMMeO)<sub>2</sub>].



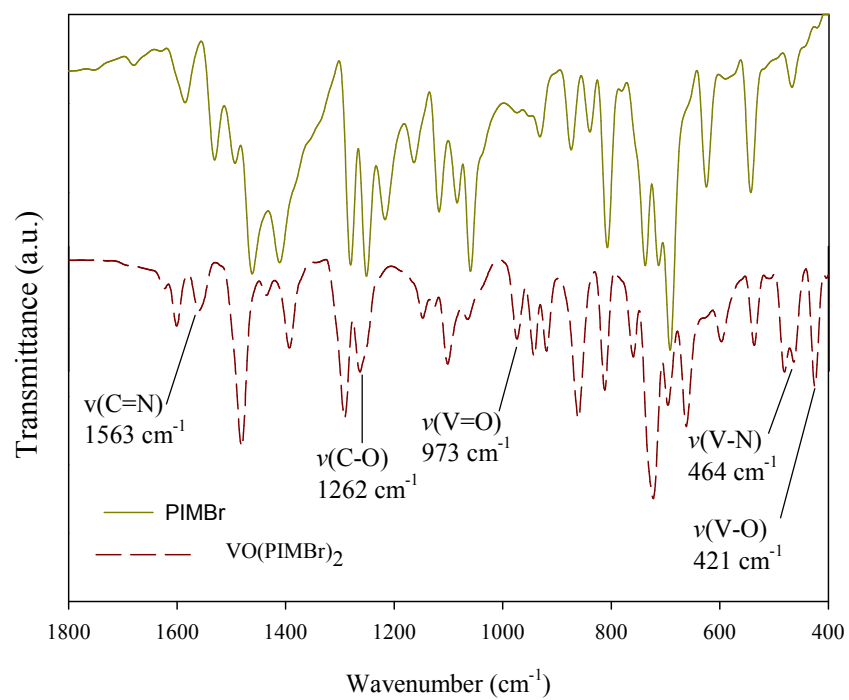

**Figure S7.** FT-IR spectra of HPIMBr and its complex [V<sup>IV</sup>O(PIMBr)<sub>2</sub>].

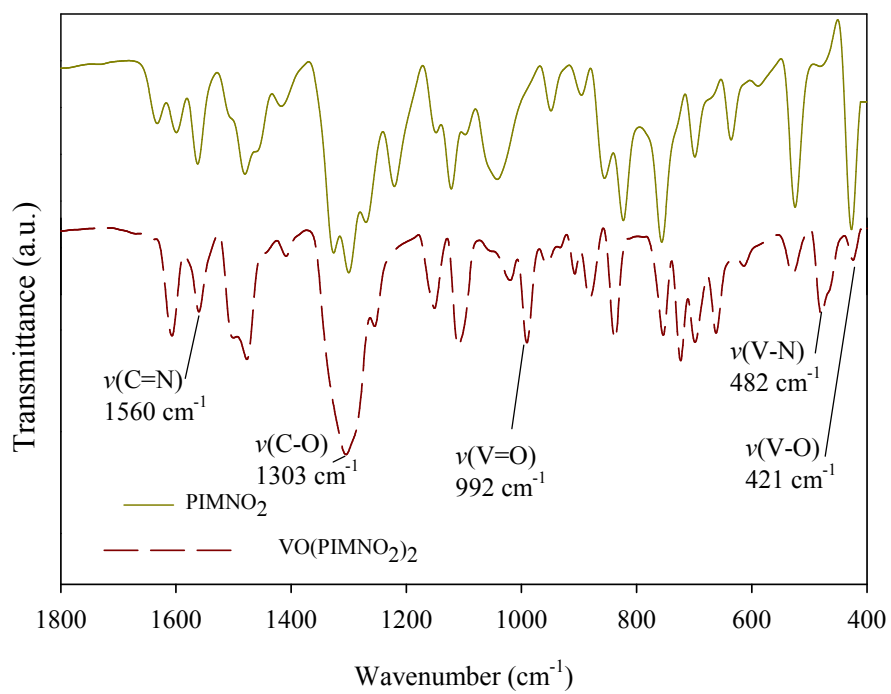

**Figure S8.** FT-IR spectra of HPIMNO<sub>2</sub> and its complex [V<sup>IV</sup>O(PIMNO<sub>2</sub>)<sub>2</sub>].

**Table S1.** FT-IR tentative assignments for important bands in the oxidovanadium(IV) complexes.

| Compound                                               | Wavenumbers (cm <sup>-1</sup> ) |                          |                          |                          |                          |
|--------------------------------------------------------|---------------------------------|--------------------------|--------------------------|--------------------------|--------------------------|
|                                                        | $\nu(\text{C}=\text{N})$        | $\nu(\text{C}-\text{O})$ | $\nu(\text{V}=\text{O})$ | $\nu(\text{V}-\text{N})$ | $\nu(\text{V}-\text{O})$ |
| [V <sup>IV</sup> O(PIMH) <sub>2</sub> ]                | 1563                            | 1148                     | 964                      | 446                      | 409                      |
| [V <sup>IV</sup> O(PIMMeO) <sub>2</sub> ]              | 1570                            | 1099                     | 944                      | 466                      | 430                      |
| [V <sup>IV</sup> O(PIMBr) <sub>2</sub> ]               | 1563                            | 1107                     | 973                      | 464                      | 421                      |
| [V <sup>IV</sup> O(PIMNO <sub>2</sub> ) <sub>2</sub> ] | 1560                            | 1148                     | 992                      | 482                      | 421                      |

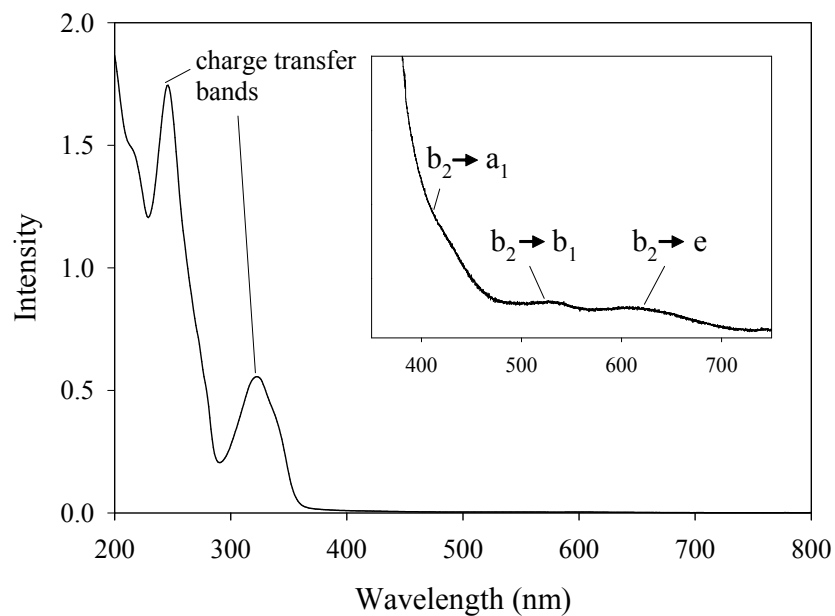

**Figure S9.** UV-Vis spectrum of  $[\text{V}^{\text{IV}}\text{O}(\text{PIMH})_2]$ . The insert is an enlargement of the d-d transition region.

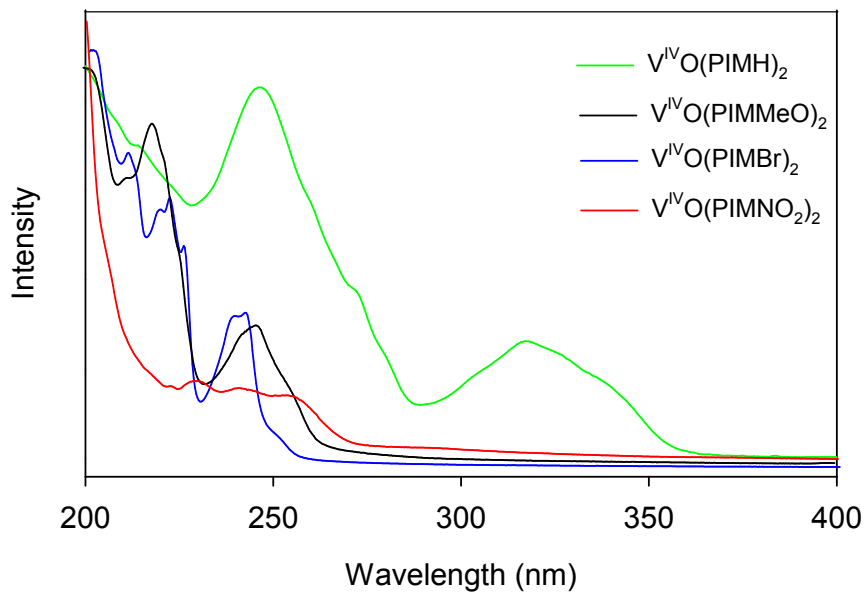

**Figure S10.** UV-Vis spectra of  $[\text{V}^{\text{IV}}\text{O}(\text{PIMH})_2]$ ,  $[\text{V}^{\text{IV}}\text{O}(\text{PIMMeO})_2]$ ,  $[\text{V}^{\text{IV}}\text{O}(\text{PIMBr})_2]$  and  $[\text{V}^{\text{IV}}\text{O}(\text{PIMNO}_2)_2]$  showing the charge transfer bands.

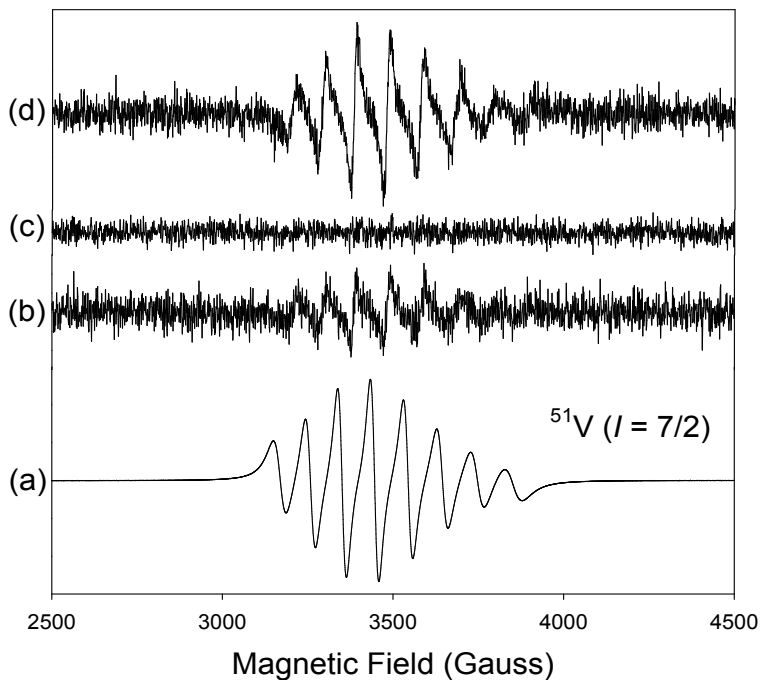

**Figure S11.** Changes in the EPR spectrum; (a) 0.100 M  $[V^{IV}O(PIMH)_2]$  in DMF, (b and c) upon addition of 3 times mole eq. 0.526 M *t*-BuOOH and (d) overnight after adding DBT.

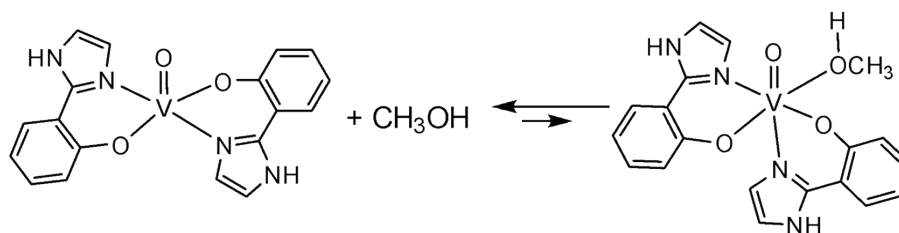

**Scheme S1.** Two plausible complexes that may form upon dissolving  $[V^{IV}O(PIMH)_2]$  in MeOH. The one shown on the left,  $[V^{IV}O(PIMH)_2]^{EQ}$ , is significantly more stable; the DFT calculated  $\Delta G^\circ$  value for the reaction in MeOH being  $+11.4 \text{ kcal}\cdot\text{mol}^{-1}$ .

**Table S2.** Selected crystal data for [V<sup>IV</sup>O(PIMH)<sub>2</sub>], [V<sup>V</sup>O(PIMH)(PIMH<sub>2</sub>)], [V<sup>IV</sup>O(PIMBr)<sub>2</sub>] and [V<sup>IV</sup>O(PIMNO<sub>2</sub>)<sub>2</sub>].

| Compound                               | [V <sup>IV</sup> O(PIMH) <sub>2</sub> ]                                                                | [V <sup>V</sup> O(PIMH)(PIMH <sub>2</sub> )]                    | [V <sup>IV</sup> O(PIMBr) <sub>2</sub> ]                                                                               | [V <sup>IV</sup> O(PIMNO <sub>2</sub> ) <sub>2</sub> ]                                                |
|----------------------------------------|--------------------------------------------------------------------------------------------------------|-----------------------------------------------------------------|------------------------------------------------------------------------------------------------------------------------|-------------------------------------------------------------------------------------------------------|
| Empirical formula                      | C <sub>18</sub> H <sub>14</sub> N <sub>4</sub> O <sub>3</sub> V<br>2(C <sub>2</sub> H <sub>6</sub> OS) | C <sub>18</sub> H <sub>15</sub> N <sub>4</sub> O <sub>4</sub> V | C <sub>18</sub> H <sub>12</sub> Br <sub>2</sub> N <sub>4</sub> O <sub>3</sub> V<br>2(C <sub>2</sub> H <sub>6</sub> OS) | C <sub>18</sub> H <sub>12</sub> N <sub>6</sub> O <sub>7</sub> V<br>(C <sub>2</sub> H <sub>6</sub> OS) |
| Formula                                | 541.53                                                                                                 | 402.28                                                          | 699.33                                                                                                                 | 553.40                                                                                                |
| Crystal                                | dark blue-green                                                                                        | yellow                                                          | dark blue-green                                                                                                        | dark blue-green                                                                                       |
| Crystal                                | monoclinic                                                                                             | orthorhombic                                                    | orthorhombic                                                                                                           | monoclinic                                                                                            |
| Space group                            | <i>P</i> 21/ <i>c</i> (No. 14)                                                                         | <i>P</i> 212121 (No. 19)                                        | <i>P</i> 212121 (No. 19)                                                                                               | <i>P</i> 21/ <i>c</i> (No. 14)                                                                        |
| Temp. (K)                              | 200                                                                                                    | 200                                                             | 200                                                                                                                    | 200                                                                                                   |
| a, b, c (Å)                            | 15.8192(9)<br>10.5686(6)<br>14.8615(8)                                                                 | 7.2579(3)    13.8117(5)<br>16.2980(6)                           | 15.3157(7)<br>15.8806(8)<br>22.1939(13)                                                                                | 13.8817(5)<br>13.0525(5)<br>13.1235(5)                                                                |
| α, γ, β (°)                            | 90, 94.964(2), 90                                                                                      | 90, 90, 90                                                      | 90, 90, 90                                                                                                             | 90, 108.646(2), 90                                                                                    |
| V (Å <sup>3</sup> )                    | 2475.3(2)                                                                                              | 1633.78(11)                                                     | 5398.1(5)                                                                                                              | 2253.05(15)                                                                                           |
| Z                                      | 4                                                                                                      | 4                                                               | 8                                                                                                                      | 4                                                                                                     |
| ρ <sub>calc</sub> (g/cm <sup>3</sup> ) | 1.453                                                                                                  | 1.635                                                           | 1.721                                                                                                                  | 1.632                                                                                                 |
| Radiation                              | 0.71073                                                                                                | 0.71073                                                         | 0.71073                                                                                                                | 0.71073                                                                                               |
| Total                                  | 43888                                                                                                  | 15488                                                           | 56689                                                                                                                  | 26442                                                                                                 |
| Unique reflections                     | 6170                                                                                                   | 4064                                                            | 13338                                                                                                                  | 5606                                                                                                  |
| R, wR2, S                              | 0.0369, 0.1025,<br>1.07                                                                                | 0.0284, 0.0758, 1.06                                            | 0.0453, 0.1212,<br>1.04                                                                                                | 0.0447, 0.1286, 1.06                                                                                  |
| *CCDC                                  | 1908640                                                                                                | 1908641                                                         | 1908642                                                                                                                | 1908643                                                                                               |

\*CCDC 1908640-1908643 contains the supplementary crystallographic data for this paper. These data can be obtained free of charge from The Cambridge Crystallographic Data Centre via [www.ccdc.cam.ac.uk/structures](http://www.ccdc.cam.ac.uk/structures)

**Table S3.** Selected bond lengths (Å) and angles (°) for [V<sup>IV</sup>O(PIMH)<sub>2</sub>], [V<sup>V</sup>O<sub>2</sub>(PIMH)(PIMH<sub>2</sub>)], [V<sup>IV</sup>O(PIMBr)<sub>2</sub>] and [V<sup>IV</sup>O(PIMNO<sub>2</sub>)<sub>2</sub>].

| [V <sup>IV</sup> O(PIMH) <sub>2</sub> ] |                    | [V <sup>V</sup> O <sub>2</sub> (PIMH)(PIMH <sub>2</sub> )] |                    | [V <sup>IV</sup> O(PIMBr) <sub>2</sub> ] |                    | [V <sup>IV</sup> O(PIMNO <sub>2</sub> ) <sub>2</sub> ] |                    |
|-----------------------------------------|--------------------|------------------------------------------------------------|--------------------|------------------------------------------|--------------------|--------------------------------------------------------|--------------------|
| V(1)-O(1)                               | 1.6101(13)         | V(1)-O(1)                                                  | 1.636(2)           | V(1)-O(1)                                | 1.594(5)           | V(1)-O(3)                                              | 1.6143(18)         |
| V(1)-O(2)                               | 1.9141(13)         | V(1)-O(2)                                                  | 1.635(2)           | V(1)-O(11)                               | 1.917(4)           | V(1)-O(11)                                             | 1.908(2)           |
| V(1)-O(3)                               | 1.9023(12)         | V(1)-O(11)                                                 | 1.949(2)           | V(1)-O(21)                               | 1.920(3)           | V(1)-O(21)                                             | 1.9126(18)         |
| V(1)-N(21)                              | 2.0620(15)         | V(1)-O(21)                                                 | 1.9608(17)         | V(1)-N(11)                               | 2.075(5)           | V(1)-N(11)                                             | 2.0586(19)         |
| V(1)-N(31)                              | 2.0617(15)         | V(1)-N(22)                                                 | 2.084(2)           | V(1)-N(21)                               | 2.064(5)           | V(1)-N(21)                                             | 2.0639(19)         |
| O(1)-V(1)-O(2)                          | 109.90(6)          | O(1)-V(1)-O(2)                                             | 106.71(11)         | O(1)-V(1)-O(11)                          | 109.11(19)         | O(3)-V(1)-O(11)                                        | 108.63(10)         |
| O(1)-V(1)-O(3)                          | 113.16(6)          | O(1)-V(1)-O(11)                                            | 102.51(9)          | O(1)-V(1)-O(21)                          | 112.2(2)           | O(3)-V(1)-O(21)                                        | 108.95(9)          |
| O(1)-V(1)-N(21)                         | 103.26(6)          | O(1)-V(1)-O(21)                                            | 111.35(9)          | O(1)-V(1)-N(11)                          | 100.5(2)           | O(3)-V(1)-N(11)                                        | 105.65(8)          |
| O(1)-V(1)-N(31)                         | 104.39(6)          | O(1)-V(1)-N(22)                                            | 97.91(9)           | O(1)-V(1)-N(21)                          | 101.0(2)           | O(3)-V(1)-N(21)                                        | 103.07(8)          |
| O(2)-V(1)-O(3)                          | 136.92(6)          | O(2)-V(1)-O(21)                                            | 141.58(10)         | O(11)-V(1)-O(21)                         | 138.69(16)         | O(11)-V(1)-O(21)                                       | 142.41(8)          |
| N(21)-V(1)-N(31)                        | 152.35(6)          | O(11)-V(1)-N(22)                                           | 155.00(8)          | N(11)-V(1)-N(21)                         | 158.46(19)         | N(11)-V(1)-N(21)                                       | 151.29(8)          |
| Average ligand bite angle               | 85.22 <sup>0</sup> | Ligand bite angle                                          | 80.86 <sup>0</sup> | Average ligand bite angle                | 86.00 <sup>0</sup> | Average ligand bite angle                              | 85.90 <sup>0</sup> |

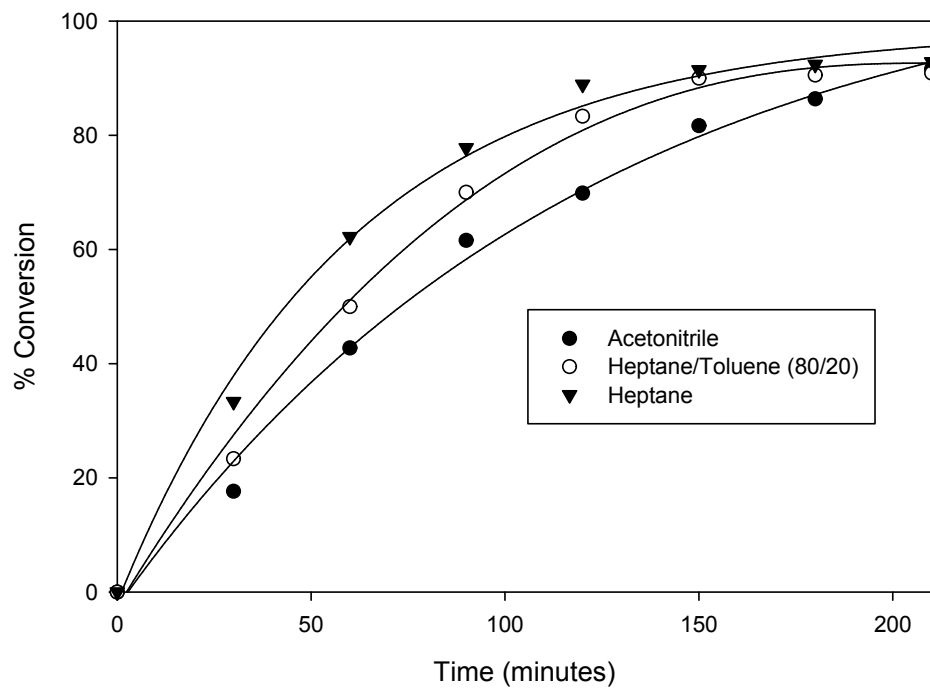

**Figure S12.** Comparing the activity of PIMH in acetonitrile, heptane and heptane/toluene (80:20). Conditions used 100 mg (0.543 mmol) of DBT, 2.0 mL (10.5 mmol) of *t*-BuOOH and 6.5  $\mu$ mol of pre-catalyst in 10 mL of solvent at 60°C.

**Table S4.** Vanadium species observed by ESI(+)-MS <sup>a</sup> Compound [V<sup>IV</sup>O(PIMH)<sub>2</sub>] dissolved in methanol except when stated otherwise.

| Species proposed                                                                    | Predicted masses (m/z)                   | Observed masses (m/z)                                        | Comments                                                                                                                                             |
|-------------------------------------------------------------------------------------|------------------------------------------|--------------------------------------------------------------|------------------------------------------------------------------------------------------------------------------------------------------------------|
| 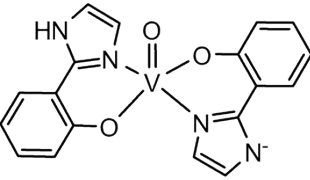   | ESI-MS(-):<br>384.04<br>385.05<br>386.05 | ESI-MS(-):<br>384.15<br>385.2<br>386.2                       | <b>Figure S13A-D</b> (below).<br>[V <sup>IV</sup> O(PIMH) <sub>2</sub> ] <sup>-</sup> : the initial complex without an H-atom.                       |
|    | 385.05<br>386.05<br>387.06               | 385.13<br>386.14<br>387.17                                   | <b>Figure S14B</b> (below).<br>[V <sup>V</sup> O(PIMH) <sub>2</sub> ] <sup>+</sup> : the initial complex but with V(V) instead of V(IV).             |
|   | m/z = 514.03<br>= 257.02                 | 257.04                                                       | <b>Figure S13B</b> (below).<br>Dimeric complex with two CH <sub>3</sub> O <sup>-</sup> ligands.                                                      |
|  | 546.05<br>547.06<br>548.06               | 545.52 (Fig. S13F)<br>545.47; 546.54;<br>547.5 (Fig. ESI-3B) | One possible assignment of the peaks at m/z = ~545.5 in CH <sub>3</sub> CN and also observed in methanol.                                            |
|  | 545.11<br>546.12<br>547.12               | 545.47<br>546.54<br>547.5 (Fig. ESI-3)                       | <b>Figures S13F and S14</b> (below)<br>Another possible assignment of the peaks at m/z = ~545.5 in CH <sub>3</sub> CN and also observed in methanol. |



|                                                                                                     |                                           |                                                  |                                                                                                                                                                                                                                                                                                                                                                                                                                                       |
|-----------------------------------------------------------------------------------------------------|-------------------------------------------|--------------------------------------------------|-------------------------------------------------------------------------------------------------------------------------------------------------------------------------------------------------------------------------------------------------------------------------------------------------------------------------------------------------------------------------------------------------------------------------------------------------------|
| 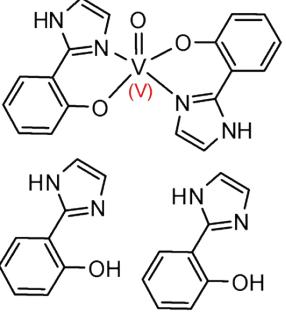                   | <p>705.18</p> <p>706.18</p> <p>707.18</p> | <p>705.79</p> <p>706.83</p> <p>707.8</p>         | <p><b>Figures S14 and S15A, B</b><br/>(below)</p> <p>One possible assignment of the peaks at <math>m/z = 705.2</math></p>                                                                                                                                                                                                                                                                                                                             |
|                    | <p>450.11</p> <p>451.11</p> <p>452.12</p> | <p>450.11</p> <p>452.1</p> <p>453.1</p>          | <p><b>Figures S14 and S15A, B</b><br/>(below).</p> <p><math>[V^{IV}O(PIMH)_2]</math>, with two MeOH and one moiety protonated.</p>                                                                                                                                                                                                                                                                                                                    |
|                   | <p>626.08</p> <p>627.08</p> <p>629.08</p> | <p>626.49</p> <p>627.5</p> <p>628.5</p>          | <p><b>Figures S14 and S15A, B</b><br/>(below).</p> <p>Dinuclear mixed-valence complex with two bridging <math>CH_3O^-</math> and one <math>t-BuOO^-</math> ligands. Very tentative assignment.</p>                                                                                                                                                                                                                                                    |
|  <p>Or, e.g.</p> | <p>691.18</p> <p>692.18</p> <p>693.19</p> | <p>691.43</p> <p>Very low relative intensity</p> | <p><b>Figure S15C</b> (below).</p> <p>Very tentative assignment of a species including <math>[V^{IV}O(PIMH)_2(t-BuOO)]^+</math> and a DBT molecule somewhere interacting with it. The MeOH may be coordinated to V(V) or not.</p> <p>Note that the <math>m/z</math> values of radical species corresponding to these structures, such as <math>c-DBT^\bullet</math> in Scheme 2, do not differ from the <math>m/z</math> values of these species.</p> |

<sup>a</sup> Only the 1<sup>st</sup> row corresponds to ESI-MS(-).

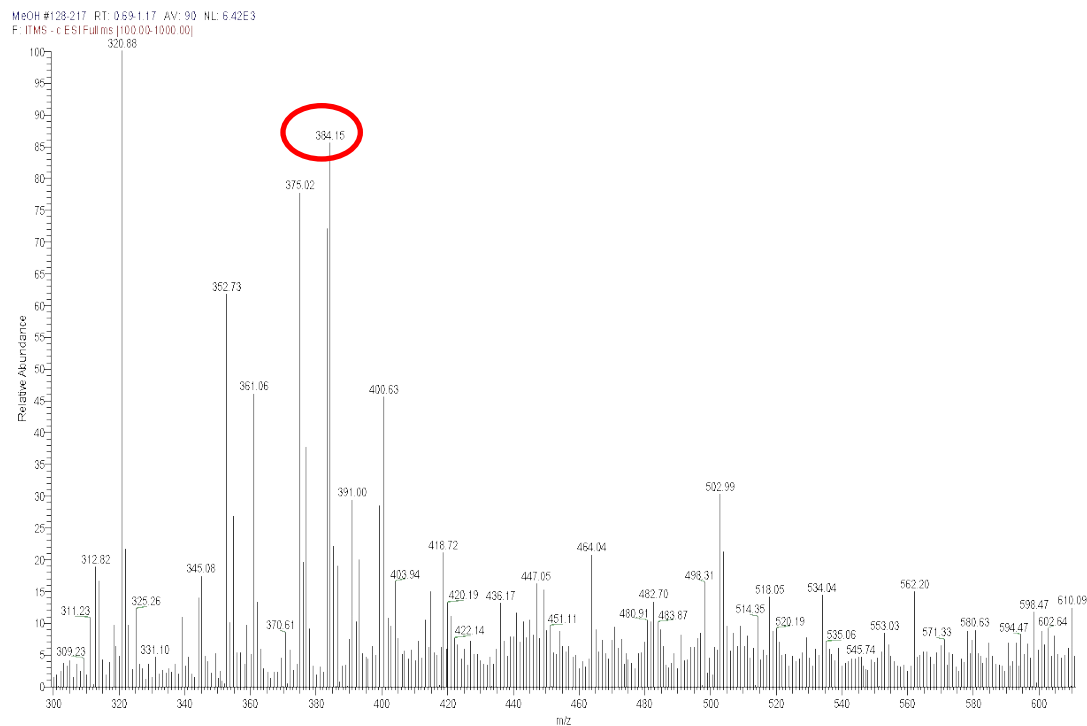

**Figure S13A.**  $[V^{IV}O(PIMH)_2]$  in methanol after 48 h of dissolution.

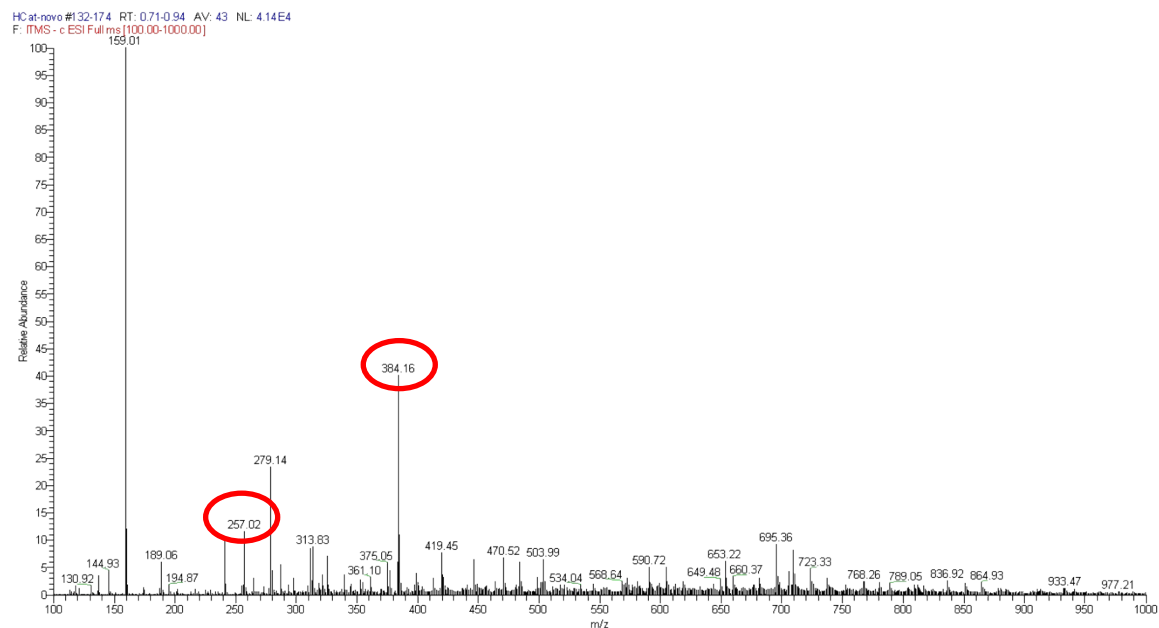

**Figure S13B.** ESI-MS(-) of  $[V^{IV}O(PIMH)_2]$  in methanol a few minutes after dissolution (peak at  $m/z = 384.16$ ).

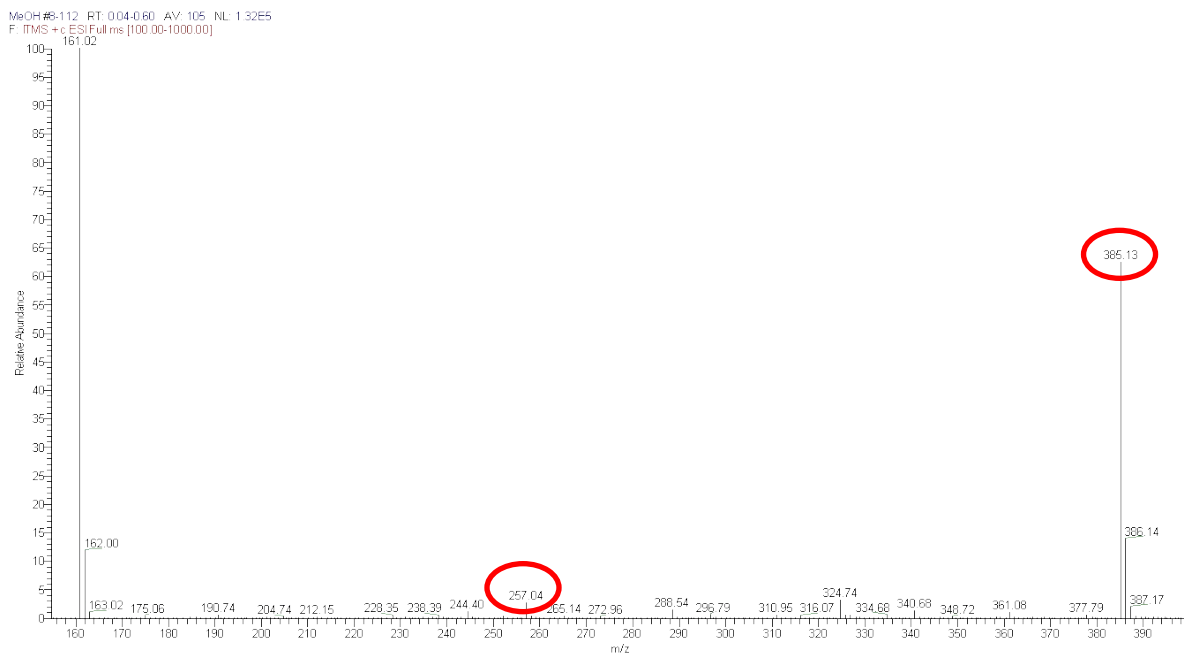

**Fig. S13C.** ESI-MS(+) [ $V^{IV}O(PIMH)_2$ ] in methanol after 48 h dissolution (peak at  $m/z = 385.13$ ).

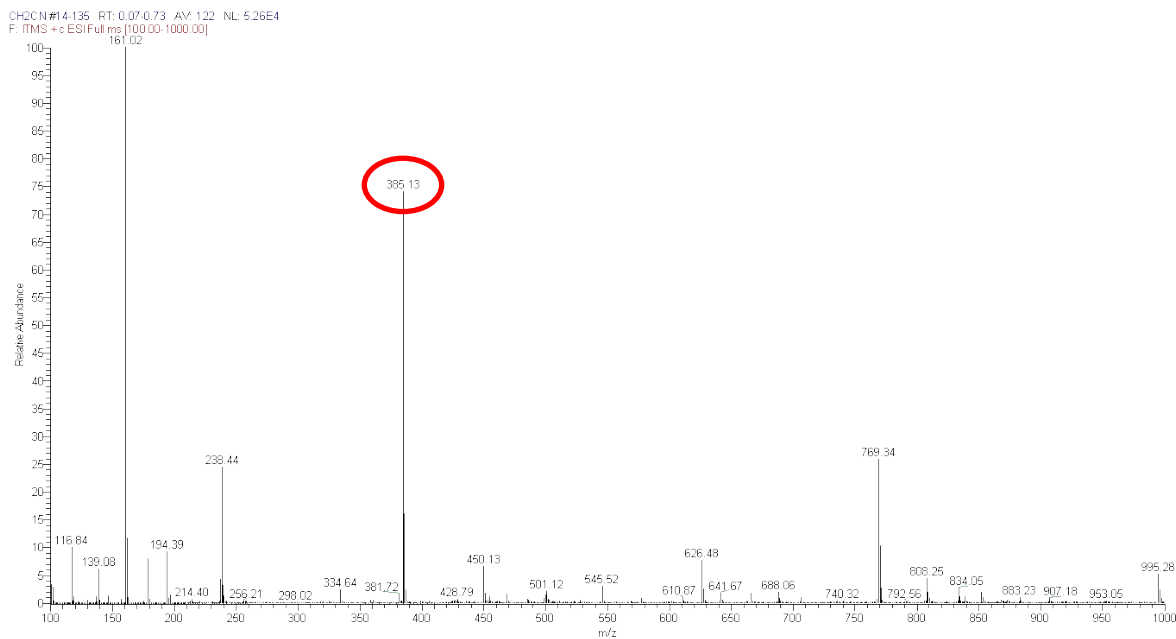

**Fig. S13D.** ESI-MS(+) of [ $V^{IV}O(PIMH)_2$ ] in methanol after 48 h dissolution (peak at  $m/z = 385.13$ ).

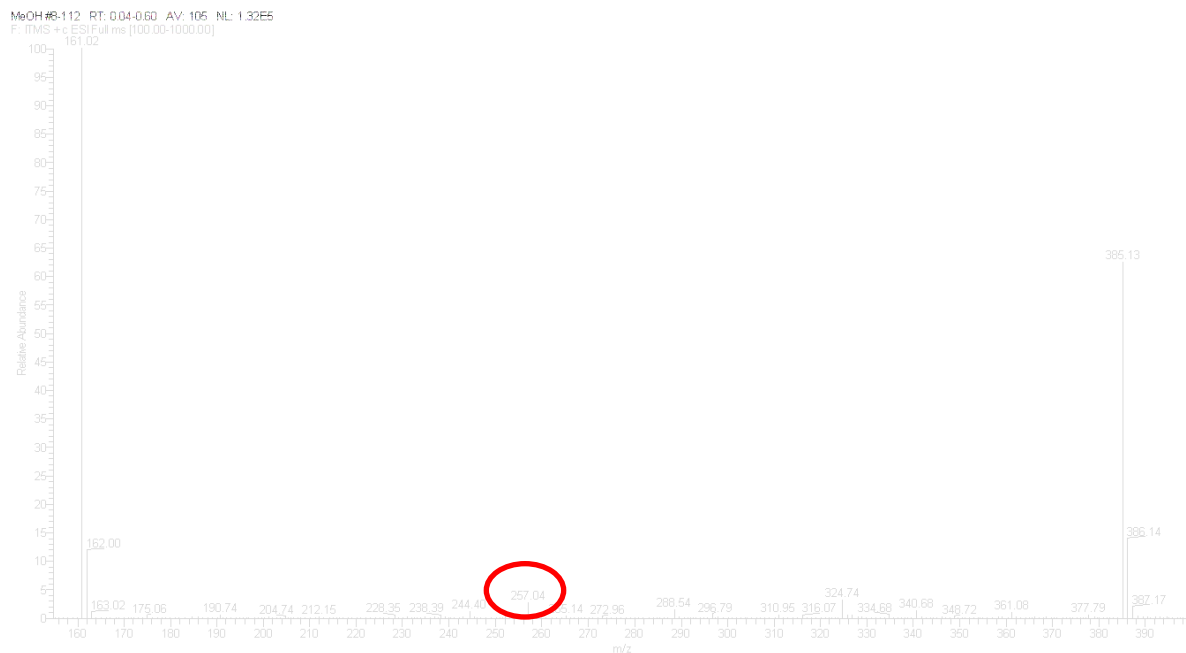

**Fig. S13E.** ESI-MS(+) of  $[V^{IV}O(PIMH)_2]$  in methanol a few minutes after dissolution (peak at  $m/z = 257.04$ ).

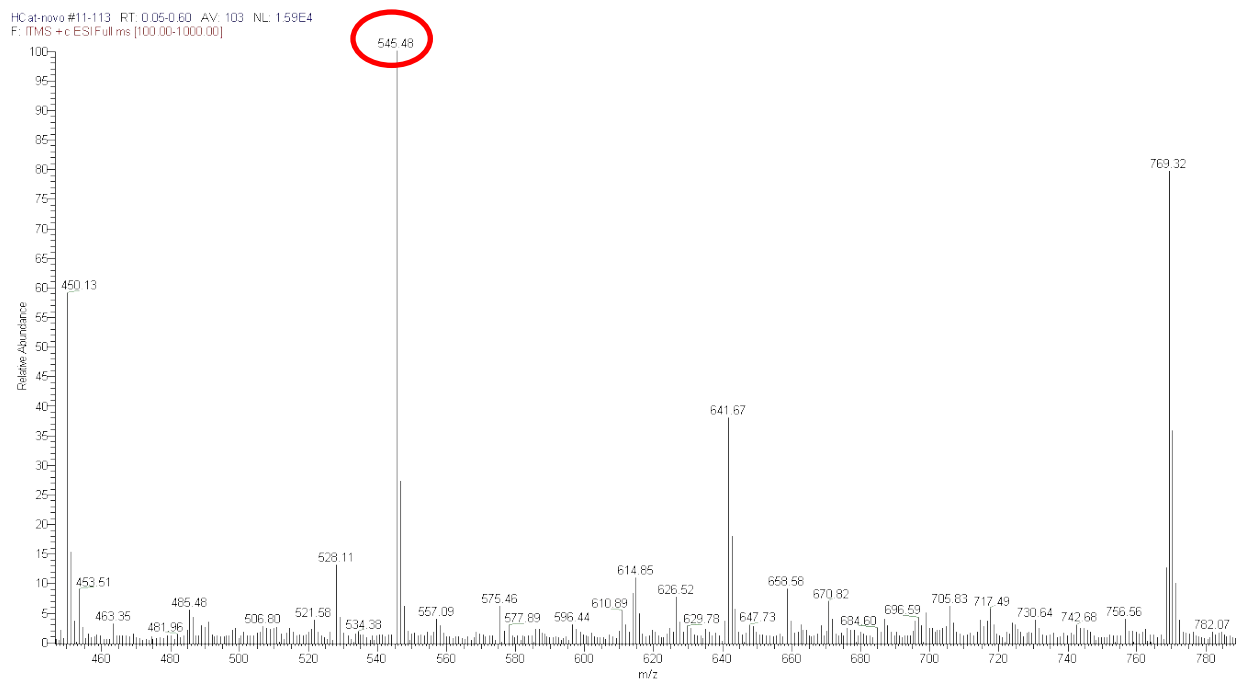

**Fig. S13F.** ESI-MS(+) of  $[V^{IV}O(PIMH)_2]$  in methanol a few minutes after dissolution (peak at  $m/z = 545.48$ ).

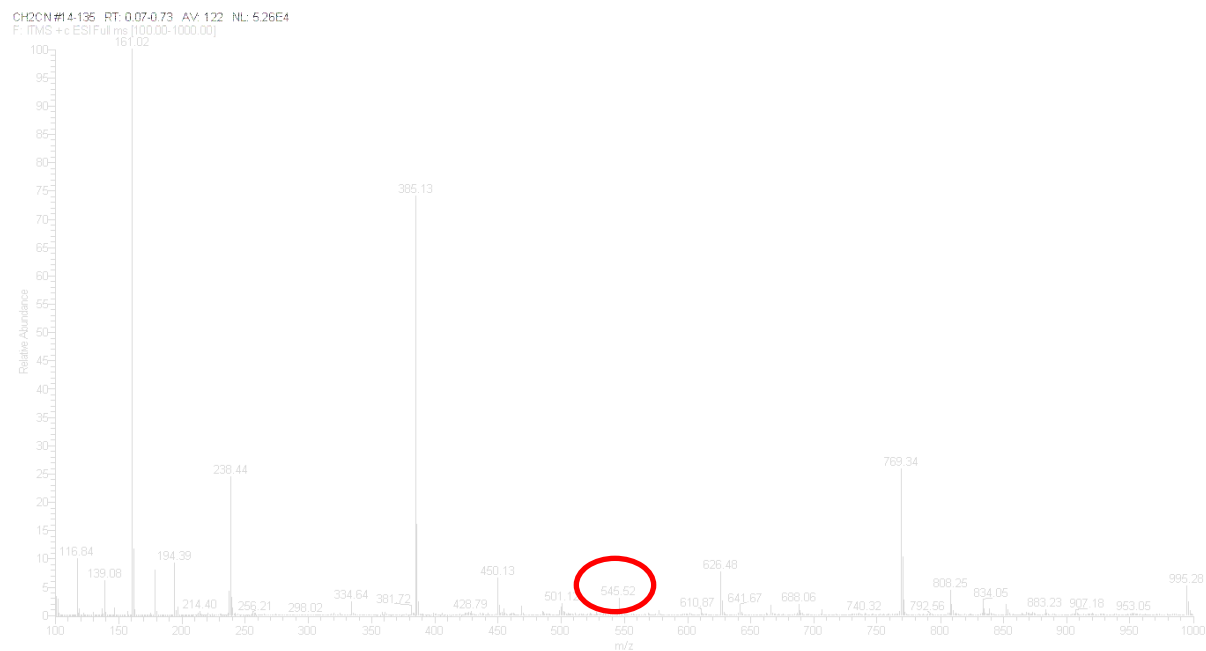

**Fig. 14A.** ESI-MS(+) of  $[V^{IV}O(PIMH)_2]$  in  $CH_3CN$  after 48 h dissolution (peak at  $m/z = 545.52$ ).

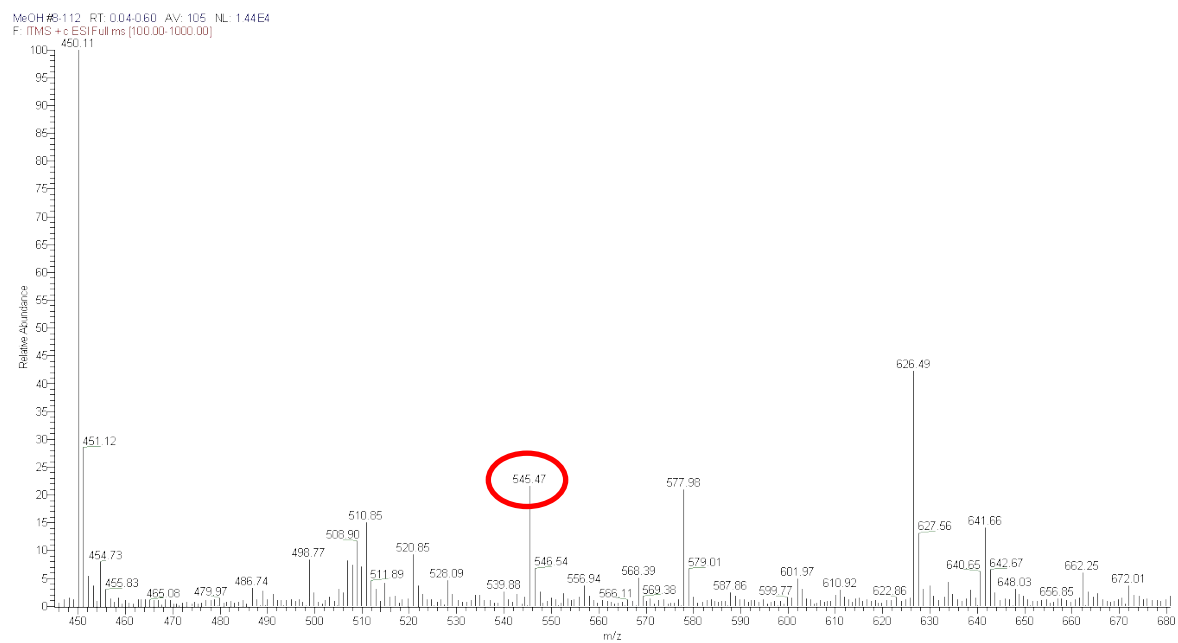

**Fig. S14B.** ESI-MS(+) of  $[V^{IV}O(PIMH)_2]$  in  $CH_3CN$  after 48 h dissolution (peak at  $m/z = 545.47$ ).

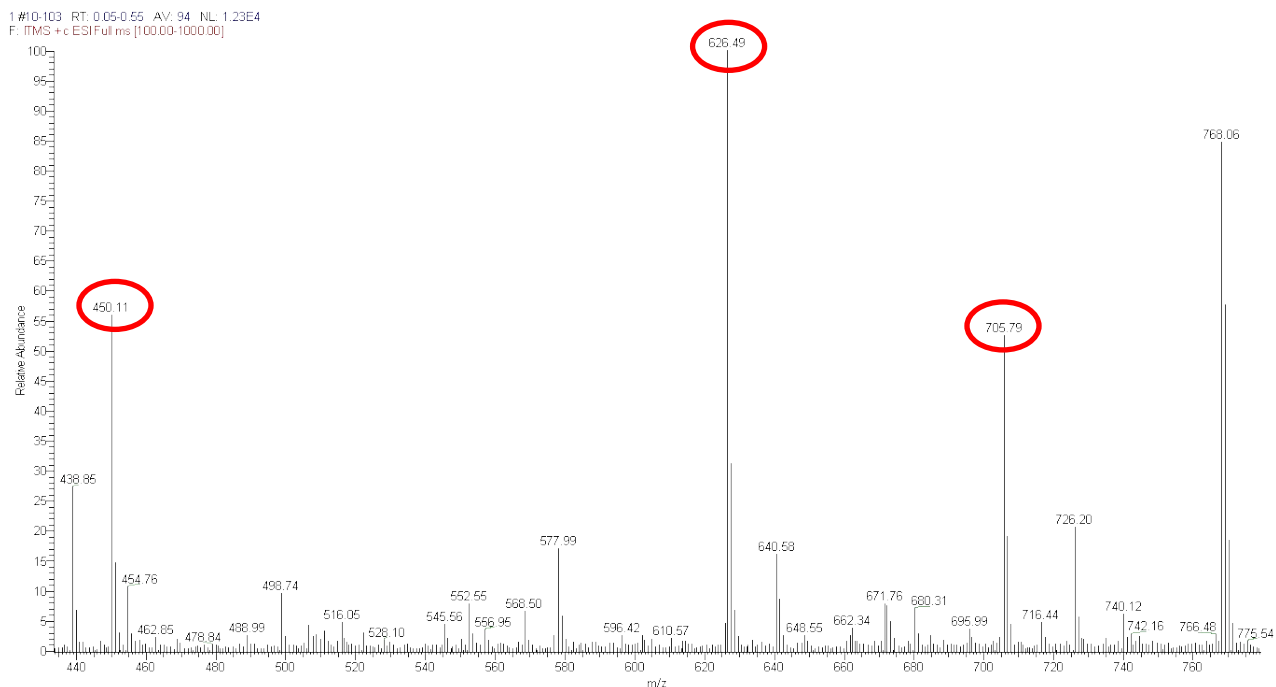

**Fig. S15A.** ESI-MS(+) of  $[V^{IV}O(PIMH)_2]$  in methanol after adding 1 equivalent of t-BuOOH (several peaks emphasized).

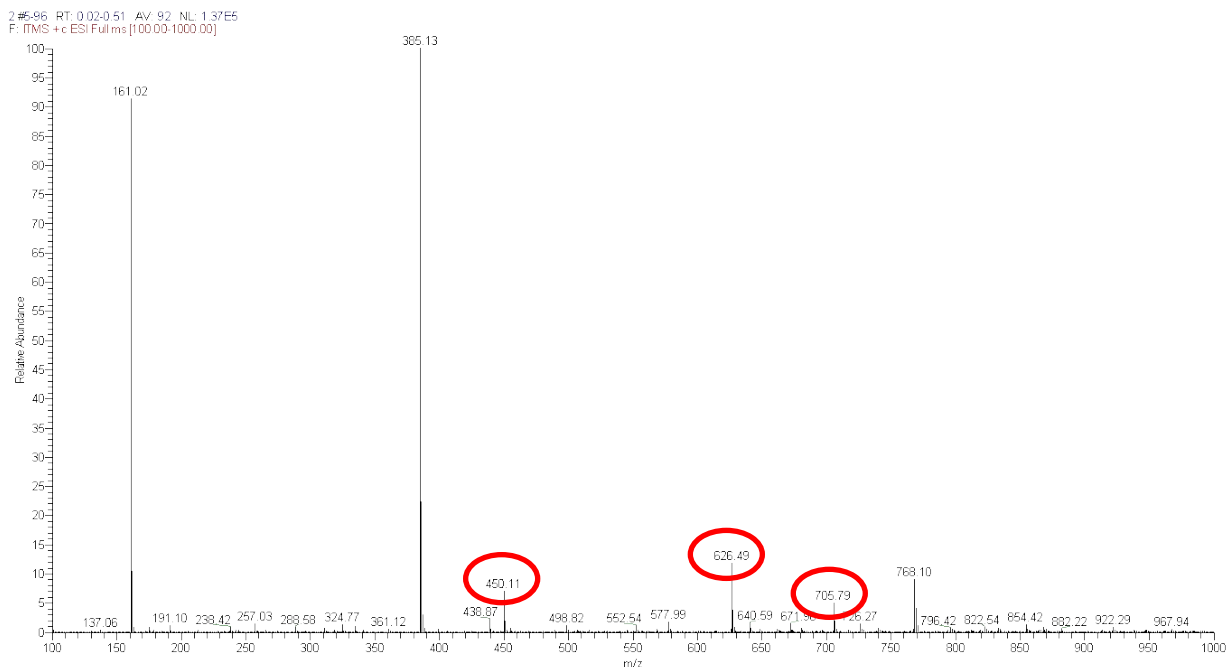

**Fig. S15B.** ESI-MS(+) of  $[V^{IV}O(PIMH)_2]$  in methanol after adding 2 equivalents of t-BuOOH (several peaks emphasized).

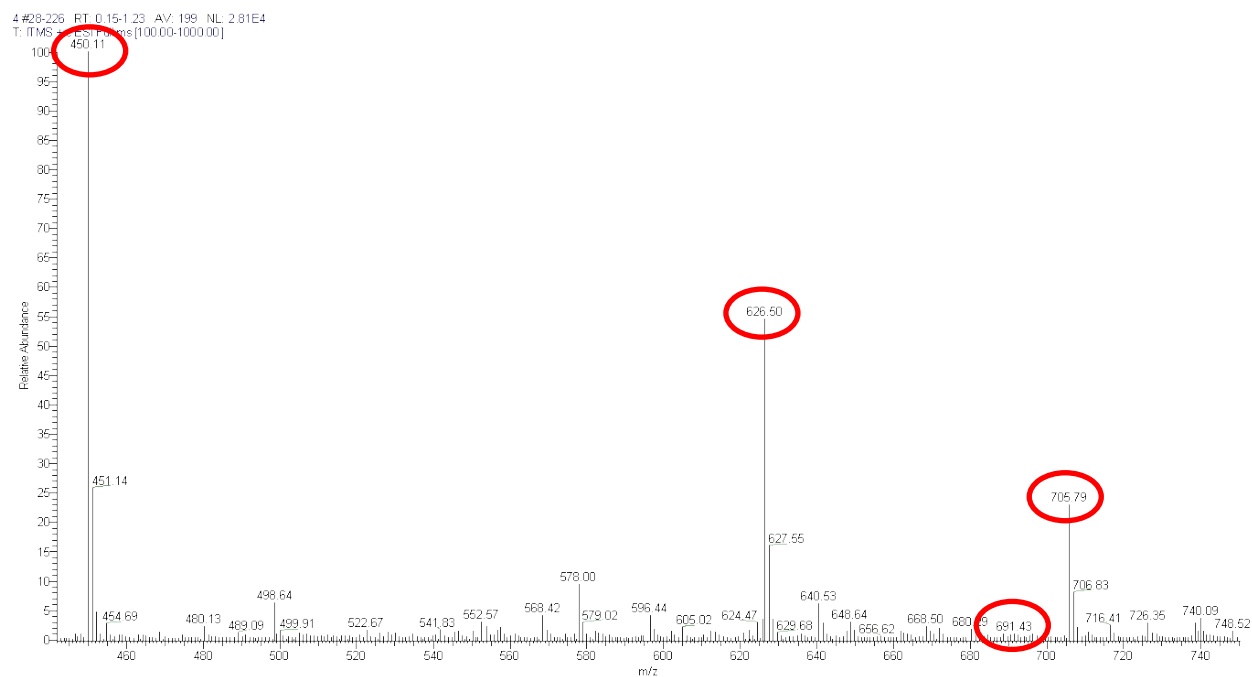

**Fig. S15C.** ESI-MS(+) of  $[V^{IV}O(PIMH)_2]$  in methanol after adding 2 equivalents of t-BuOOH and 2 equivalents of dibenzothiophenes (DBT) (several peaks emphasized, namely the one at  $m/z = 691.43$ ).



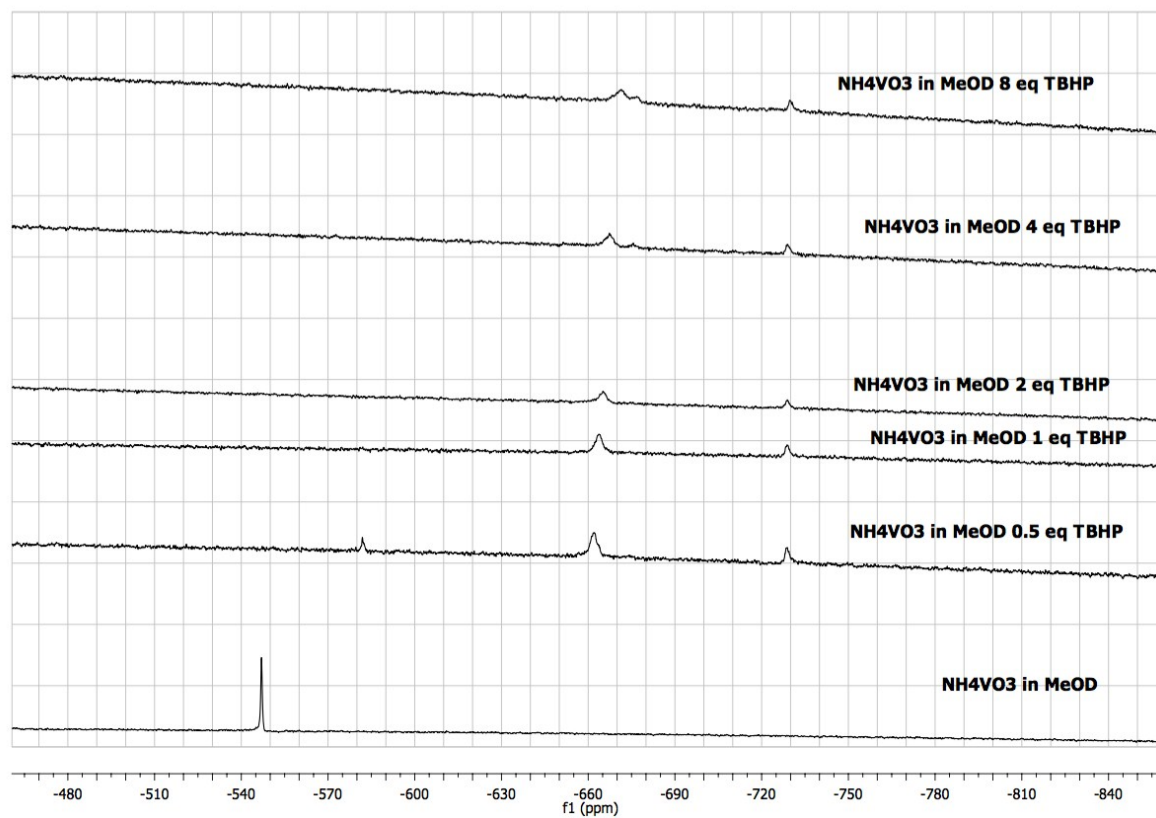

**Figure S16.**  $^{51}\text{V}$  NMR spectra of  $\text{NH}_4\text{V}^{\text{V}}\text{O}_3$  in  $\text{MeOD-d}_4$  (7.00 mM) after additions of a solution of  $t\text{-BuOOH}$  (0.73M).

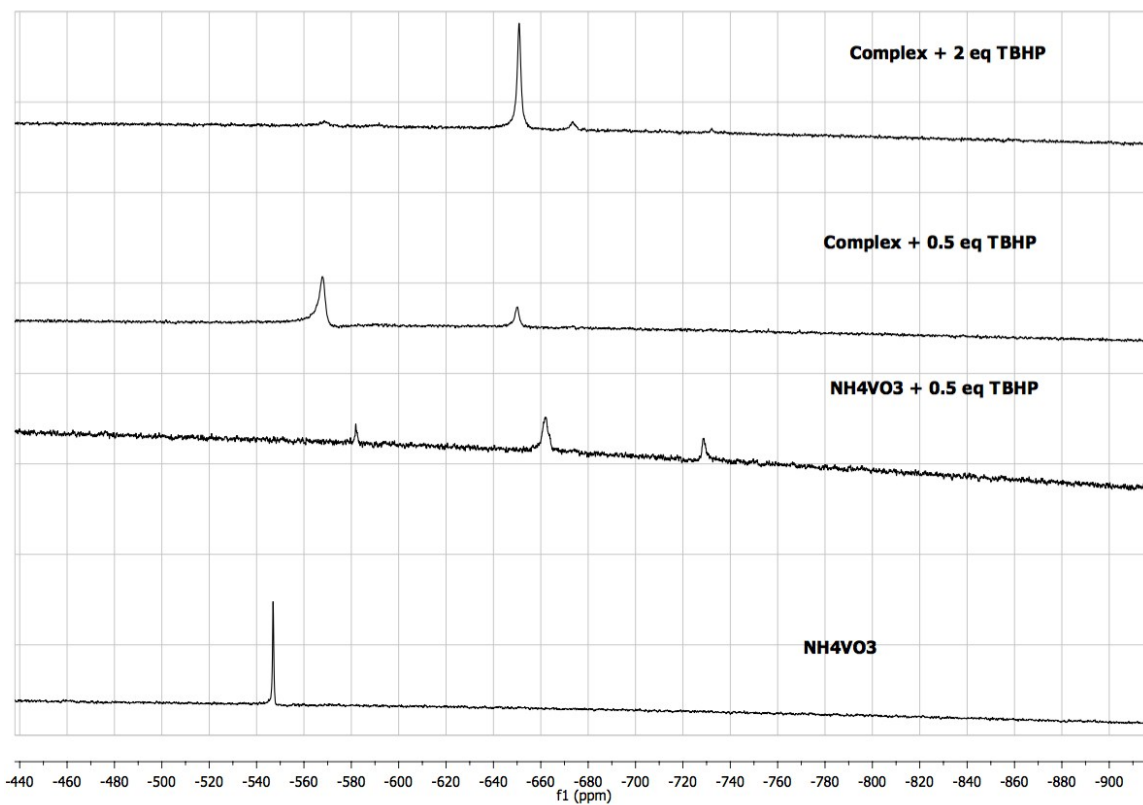

**Figure S17.** Comparison of the  $^{51}\text{V}$  NMR spectra measured for the complex  $[\text{V}^{\text{IV}}\text{O}(\text{PIMH})_2]$  (7.00 mM) in  $\text{MeOH-d}_4$  and of  $\text{NH}_4\text{V}^{\text{VO}}_3$  after additions of the oxidant. The corresponding  $\delta_{\text{V}}$  values of oxidoperoxidovanadium(V) clearly differ.

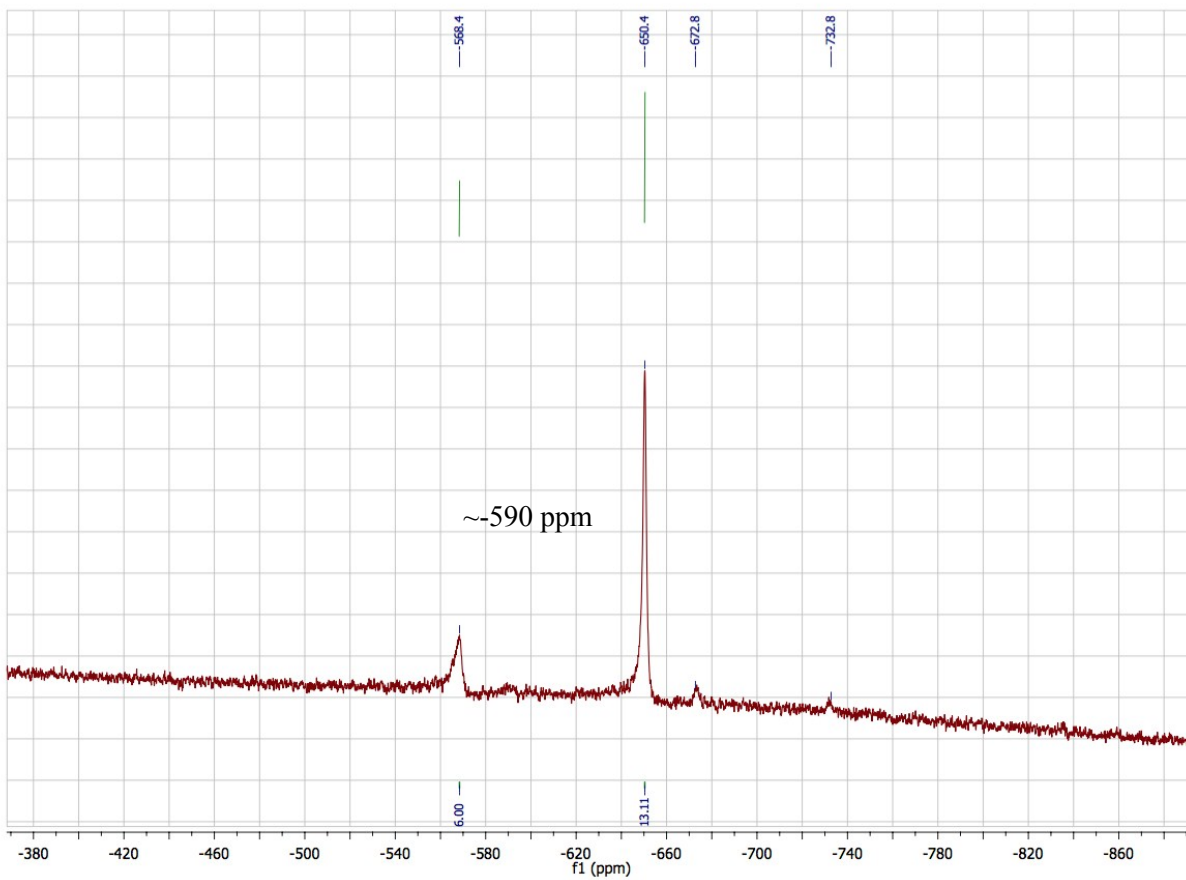

**Figure S18.**  $^{51}\text{V}$  NMR spectrum of the complex  $[\text{V}^{\text{IV}}\text{O}(\text{PIMH})_2]$  (5 mM) in  $\text{MeOH-d}_4$  with 1 eq. *t*-BuOOH. A low intensity resonance is detected at  $\delta_{\text{V}}$  ca. -590 ppm.

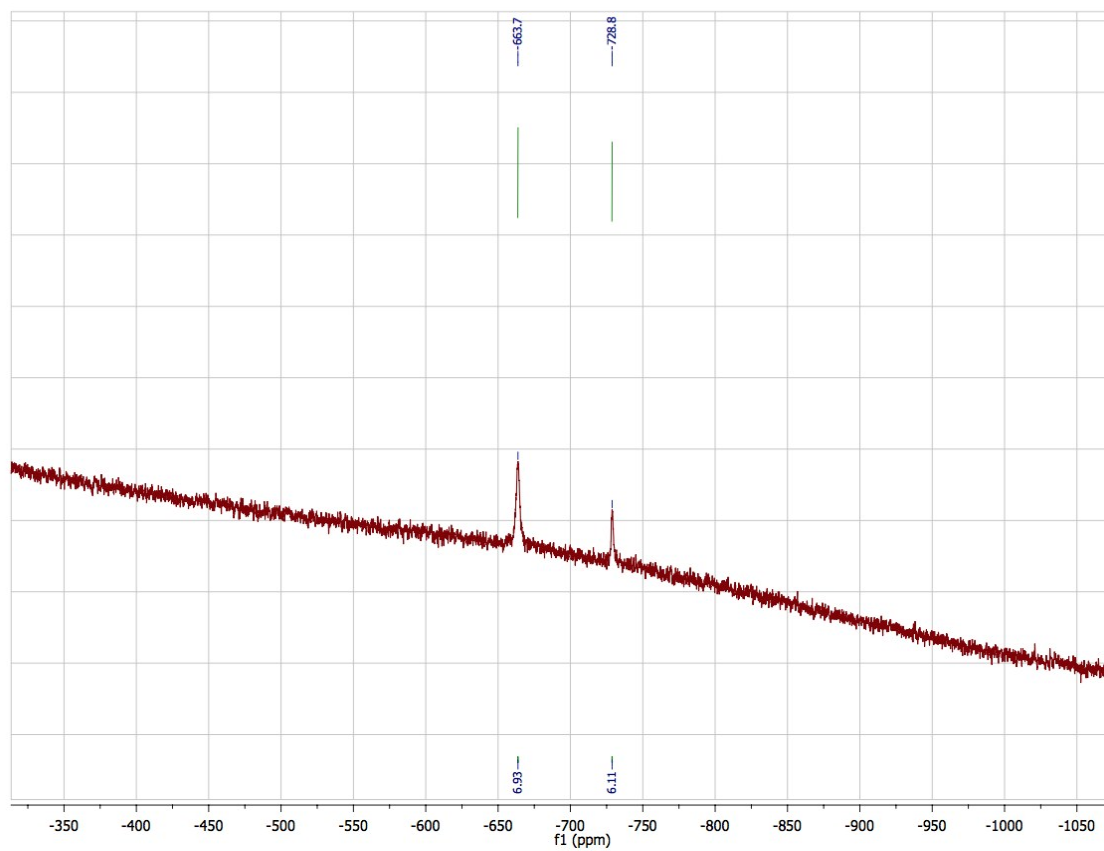

**Figure S19.**  $^{51}\text{V}$  NMR spectrum of  $\text{NH}_4\text{VVO}_3$  (7 mM) in  $\text{MeOH-d}_4$  with 1 eq. *t*-BuOOH.

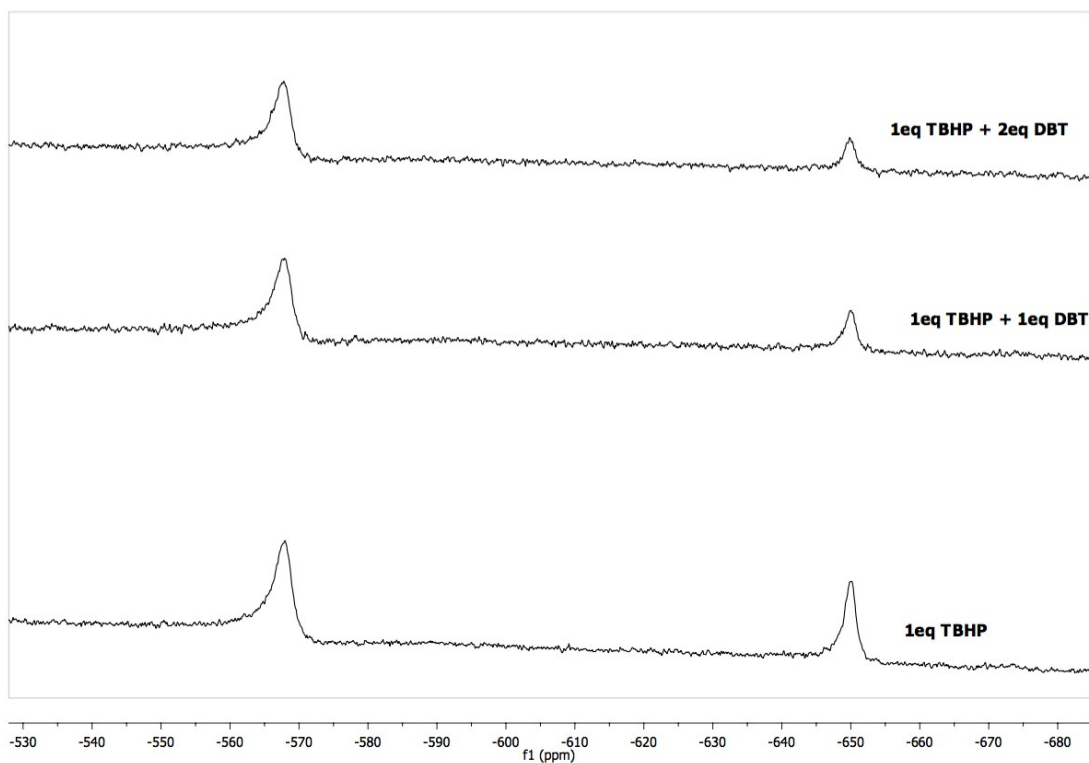

**Figure S20.**  $^{51}\text{V}$  NMR spectra of solutions containing  $[\text{V}^{\text{IV}}\text{O}(\text{PIMH})_2]$  (5 mM), 1 eq of *t*-BuOOH) and 0, 1 or 2 eq of DBT (substrate added at room temperature), waiting a few minutes before measuring the spectra. The intensity of all peaks appears to decrease upon additions of DBT.

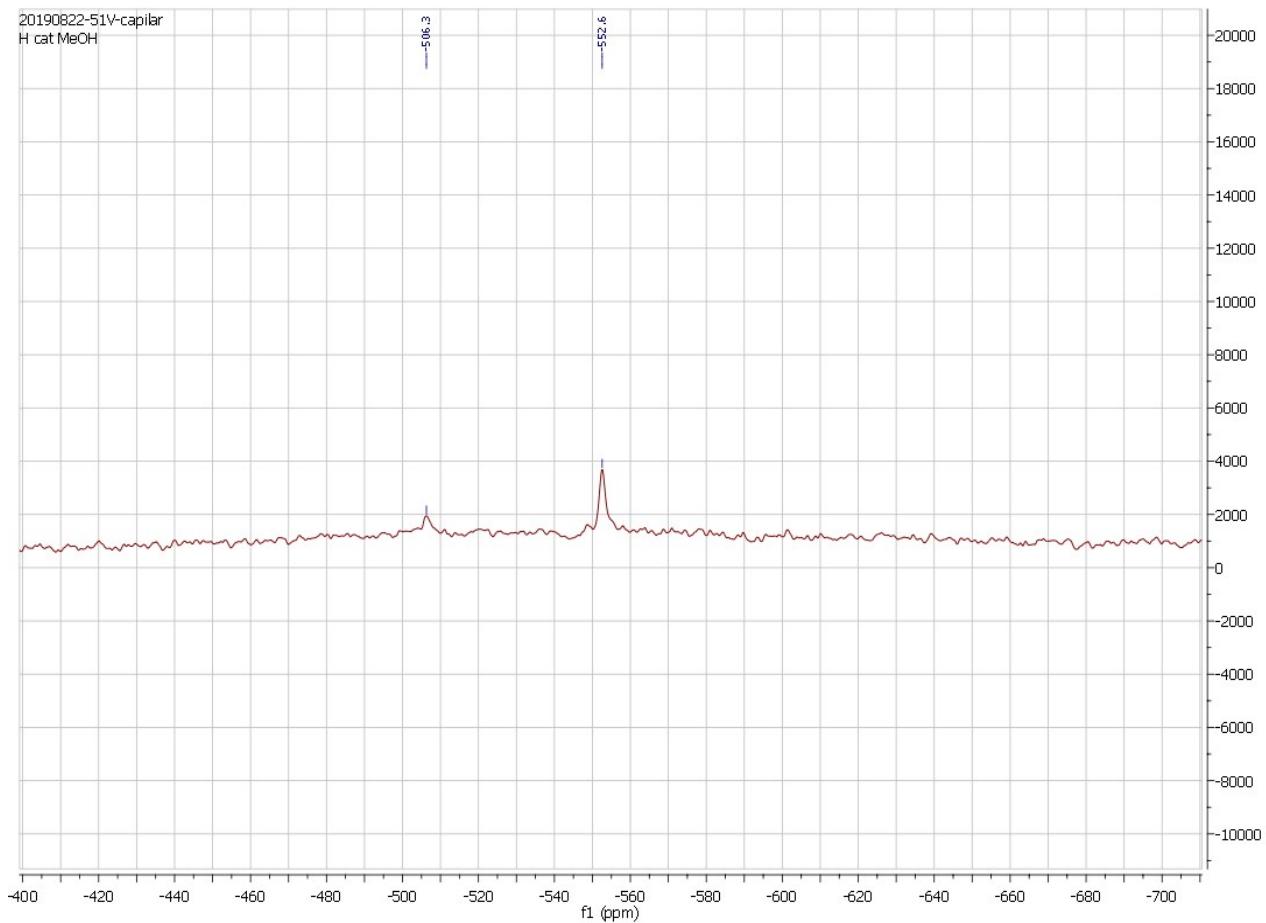

**Figure S21.**  $^{51}\text{V}$  NMR spectra of solutions in MeOH:toluene (90:10) containing  $[\text{V}^{\text{IV}}\text{O}(\text{PIMH})_2]$  (concentration  $< 3$  mM) after several hours in contact with air. Peaks are detected at  $\delta_V = -506.3$  and  $-552.6$  ppm.

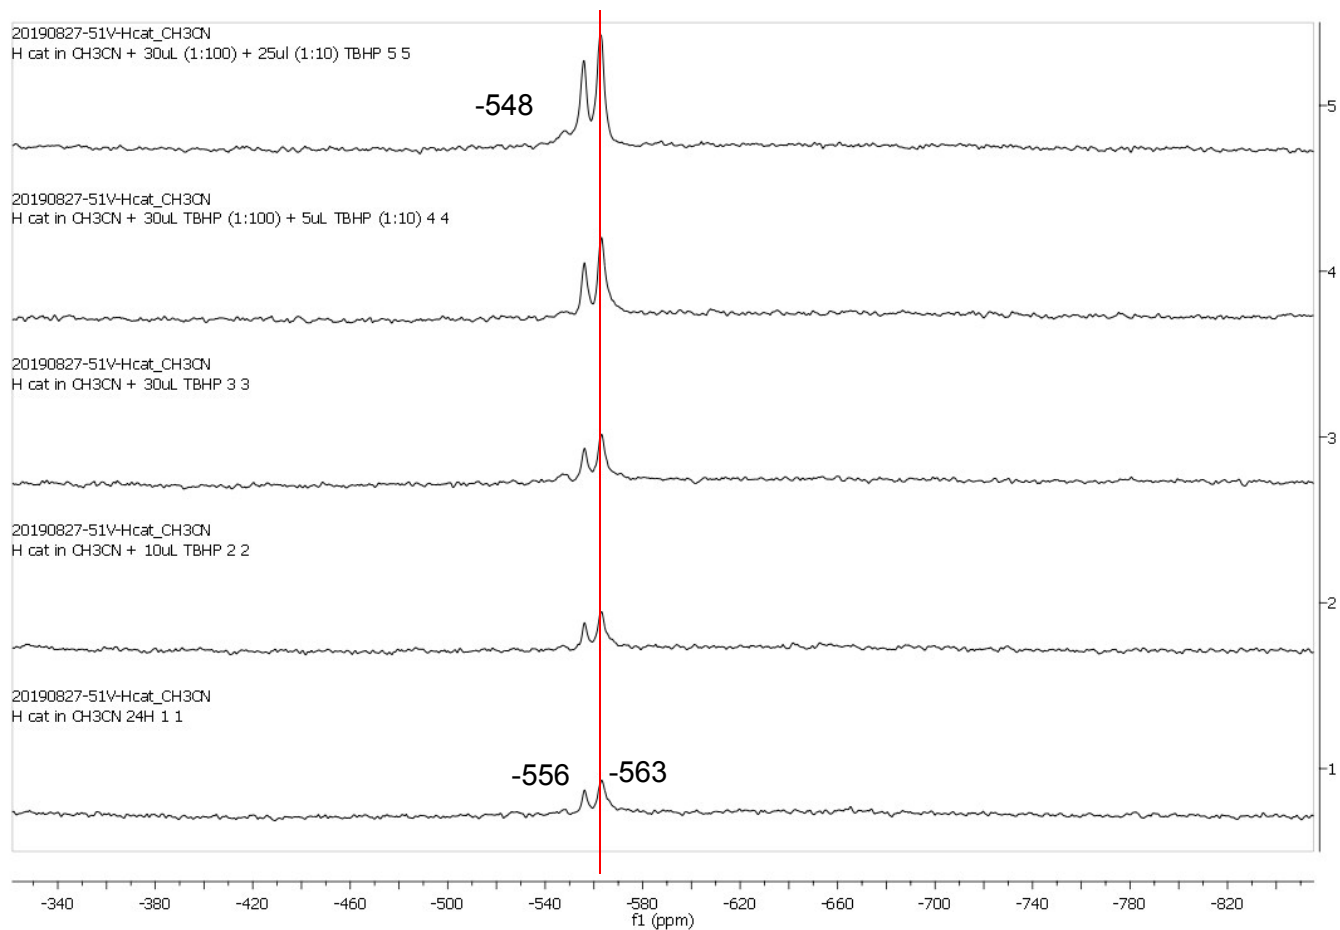

**Figure S22.**  $^{51}\text{V}$  NMR spectra of solutions containing  $[\text{V}^{\text{IV}}\text{O}(\text{PIMH})_2]$  (concentration  $< 3$  mM) in  $\text{CH}_3\text{CN}$ :toluene (90:10) after ca. 24 h in air and upon successive additions of *t*-BuOOH. Peaks are detected at  $\delta_{\text{V}} = -556$  and  $-563$  ppm, probably two isomers of  $\text{V}(\text{V})$ -PIMH complexes. After adding high amounts of *t*-BuOOH a small peak is detected at  $-548$ , probably due to vanadate(V).

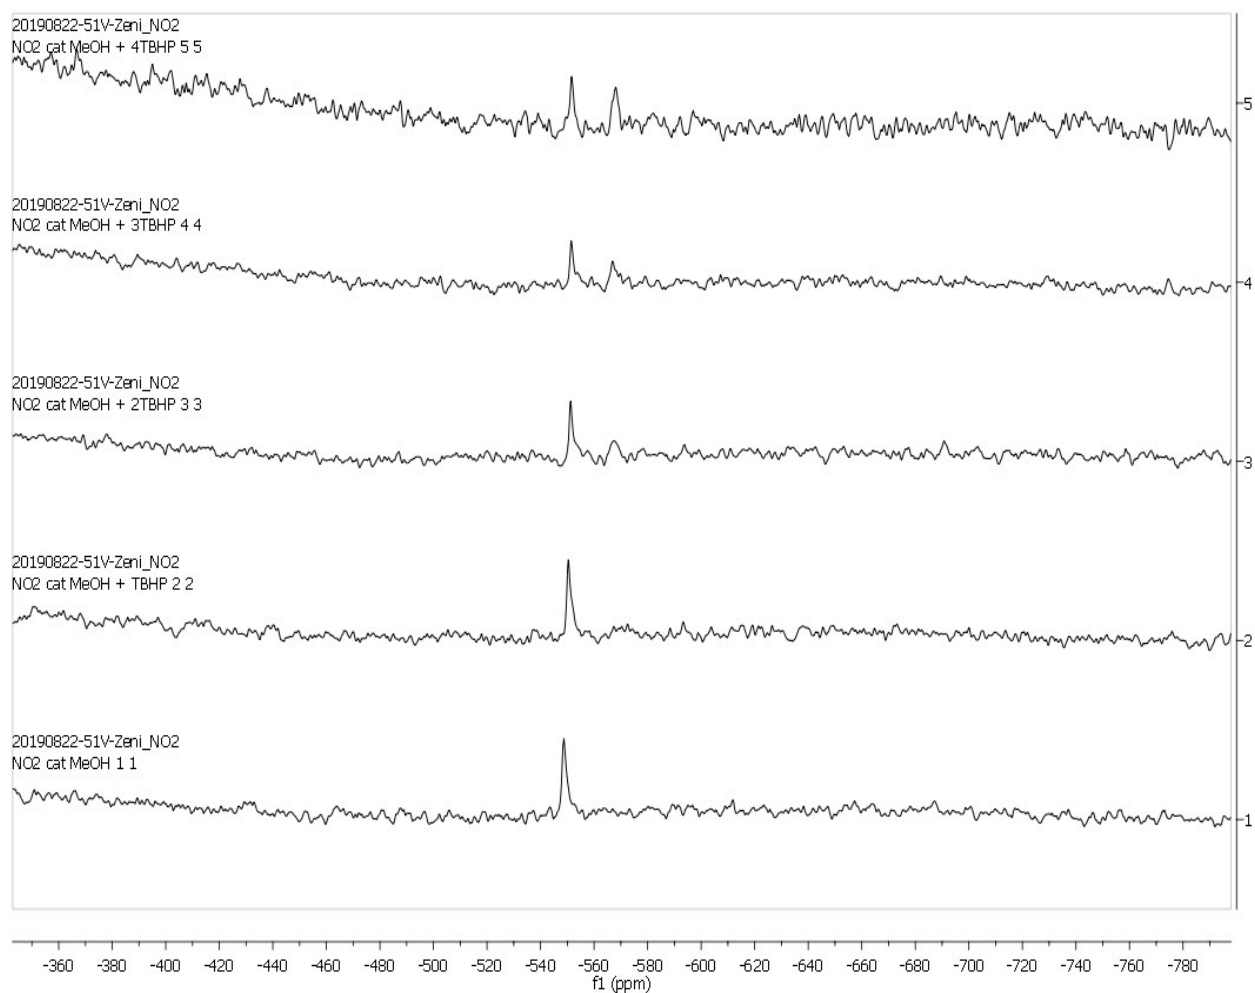

**Figure S23.**  $^{51}\text{V}$  NMR spectra of solutions containing  $[\text{V}^{\text{IV}}\text{O}(\text{PIMNO}_2)_2]$  (concentration  $< 3$  mM) in  $\text{MeOH}:\text{toluene}$  (90:10) after a few hours in air and upon successive additions of  $t\text{-BuOOH}$ . Peaks are initially detected at  $\delta_{\text{V}} = -551$  and  $-568$  after additions of  $t\text{-BuOOH}$ ; probably these correspond to isomers of  $[\text{V}^{\text{V}}\text{O}(\text{PIMNO}_2)_2]$ .



|                                                                                                                                                                                                                                                                                                                                                                                           |                                                                                                                                                                                                                                                                                                                                                                                          |                                                                                                                                                                                                                                                                                                                                                                                             |
|-------------------------------------------------------------------------------------------------------------------------------------------------------------------------------------------------------------------------------------------------------------------------------------------------------------------------------------------------------------------------------------------|------------------------------------------------------------------------------------------------------------------------------------------------------------------------------------------------------------------------------------------------------------------------------------------------------------------------------------------------------------------------------------------|---------------------------------------------------------------------------------------------------------------------------------------------------------------------------------------------------------------------------------------------------------------------------------------------------------------------------------------------------------------------------------------------|
| 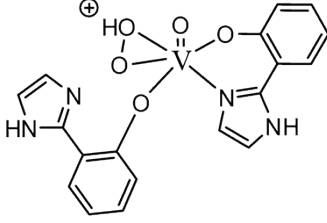 <p><b>d1</b></p> <p><math>\delta_V^{\text{calc}}(\text{MeOH}) = -424 \text{ ppm}</math><br/> <math>\delta_V^{\text{calc}}(\text{CH}_3\text{CN}) = -420 \text{ ppm}</math><br/> <math>\delta_V^{\text{calc}}(\text{heptane}) = -415 \text{ ppm}</math><br/> <math>G_r: 20.7, 22.5, 22.8, 23.9</math></p> |  <p><b>d2</b></p> <p>During calculation it was transformed to <b>d4</b>.</p>                                                                                                                                                                                                                            |  <p><b>d4</b></p> <p><math>\delta_V^{\text{calc}}(\text{MeOH}) = -594 \text{ ppm}</math><br/> <math>\delta_V^{\text{calc}}(\text{CH}_3\text{CN}) = -577 \text{ ppm}</math><br/> <math>\delta_V^{\text{calc}}(\text{heptane}) = -564 \text{ ppm}</math><br/> <math>G_r: 0.9, 0.4, 0.0, 3.2</math></p>     |
|  <p><b>d3</b></p> <p><math>\delta_V^{\text{calc}}(\text{MeOH}) = -650 \text{ ppm}</math><br/> <math>\delta_V^{\text{calc}}(\text{CH}_3\text{CN}) = -638 \text{ ppm}</math><br/> <math>\delta_V^{\text{calc}}(\text{heptane}) = -625 \text{ ppm}</math></p>                                               |  <p><b>d3a</b></p> <p><math>\delta_V^{\text{calc}}(\text{MeOH}) = -658 \text{ ppm}</math><br/> <math>\delta_V^{\text{calc}}(\text{CH}_3\text{CN}) = -633 \text{ ppm}</math><br/> <math>\delta_V^{\text{calc}}(\text{heptane}) = -620 \text{ ppm}</math></p>                                             | <p><b>d3</b> is more stable than <b>d3a</b> by <math>5.9 \text{ kcal}\cdot\text{mol}^{-1}</math> in <math>\text{CH}_3\text{CN}</math>, by <math>3.7 \text{ kcal}\cdot\text{mol}^{-1}</math> in <math>\text{MeOH}</math> and by <math>4.5 \text{ kcal}\cdot\text{mol}^{-1}</math> in <math>\text{heptane}</math>.</p>                                                                        |
|  <p><b>d5</b></p> <p><math>\delta_V^{\text{calc}}(\text{MeOH}) = -528 \text{ ppm}</math><br/> <math>\delta_V^{\text{calc}}(\text{CH}_3\text{CN}) = -524 \text{ ppm}</math><br/> <math>\delta_V^{\text{calc}}(\text{heptane}) = -516 \text{ ppm}</math><br/> <math>G_r: 5.4, 6.8, 9.0, 7.0</math></p>   |  <p><b>d5a</b></p> <p><math>\delta_V^{\text{calc}}(\text{MeOH}) = -385 \text{ ppm}</math><br/> <math>\delta_V^{\text{calc}}(\text{CH}_3\text{CN}) = -379 \text{ ppm}</math><br/> <math>\delta_V^{\text{calc}}(\text{heptane}) = -355 \text{ ppm}</math><br/> <math>G_r: 0.0, 0.0, 3.4, 0.0</math></p> |  <p><b>d5b</b></p> <p><math>\delta_V^{\text{calc}}(\text{MeOH}) = -663 \text{ ppm}</math><br/> <math>\delta_V^{\text{calc}}(\text{CH}_3\text{CN}) = -659 \text{ ppm}</math><br/> <math>\delta_V^{\text{calc}}(\text{heptane}) = -651 \text{ ppm}</math><br/> <math>G_r: 3.6, 7.0, 11.2, 6.0</math></p> |

**Figure S24.** Some of the molecular structures that may be envisaged for  $\text{V}^{\text{VO}}(\text{HOO})$ -complexes; in several cases charges were omitted. The DFT calculated  $^{51}\text{V}$  NMR chemical shifts and relative Gibbs free energies ( $G_r$ , in  $\text{kcal}\cdot\text{mol}^{-1}$ ), when comparable, are indicated. The relative energies given are in sequence: gas phase,  $\text{CH}_3\text{CN}$  solution,  $\text{MeOH}$  solution and  $\text{heptane}$  solution. Note that

**d5a** is more stable than **d5**, but its  $\delta_V^{\text{calc}}$  is too negative to be considered as a plausible species, as no resonances were found below ca.  $|-550|$  ppm in solutions where peroxides are present.

**Table S5.** The calculated chemical shifts for species corresponding to **b3** and **c** are included for complexes  $[\text{V}^{\text{IV}}\text{O}(\text{PIMH})_2]$ ,  $[\text{V}^{\text{IV}}\text{O}(\text{PIMNO}_2)_2]$ ,  $[\text{V}^{\text{IV}}\text{O}(\text{PIMBr})_2]$  and  $[\text{V}^{\text{IV}}\text{O}(\text{PIMMeO})_2]$ .

| Complex (structure and substituent) | $\delta_V^{\text{calc}}$ in $\text{CH}_3\text{CN}$ | $\delta_V^{\text{calc}}$ in $\text{MeOH}$ |
|-------------------------------------|----------------------------------------------------|-------------------------------------------|
| <b>b-NO<sub>2</sub></b>             | -526 ppm                                           | -558 ppm                                  |
| <b>b3-H</b>                         | -523 ppm                                           | -567 ppm                                  |
| <b>b-Br</b>                         | -526 ppm                                           | -555 ppm                                  |
| <b>b-OMe</b>                        | -523 ppm                                           | -547 ppm                                  |
|                                     |                                                    |                                           |
| <b>c-NO<sub>2</sub></b>             | -553 ppm                                           | -583 ppm                                  |
| <b>c-H</b>                          | -568 ppm                                           | -594 ppm                                  |
| <b>c-Br</b>                         | -561 ppm                                           | -589 ppm                                  |
| <b>c-OMe</b>                        | -560 ppm                                           | -583 ppm                                  |

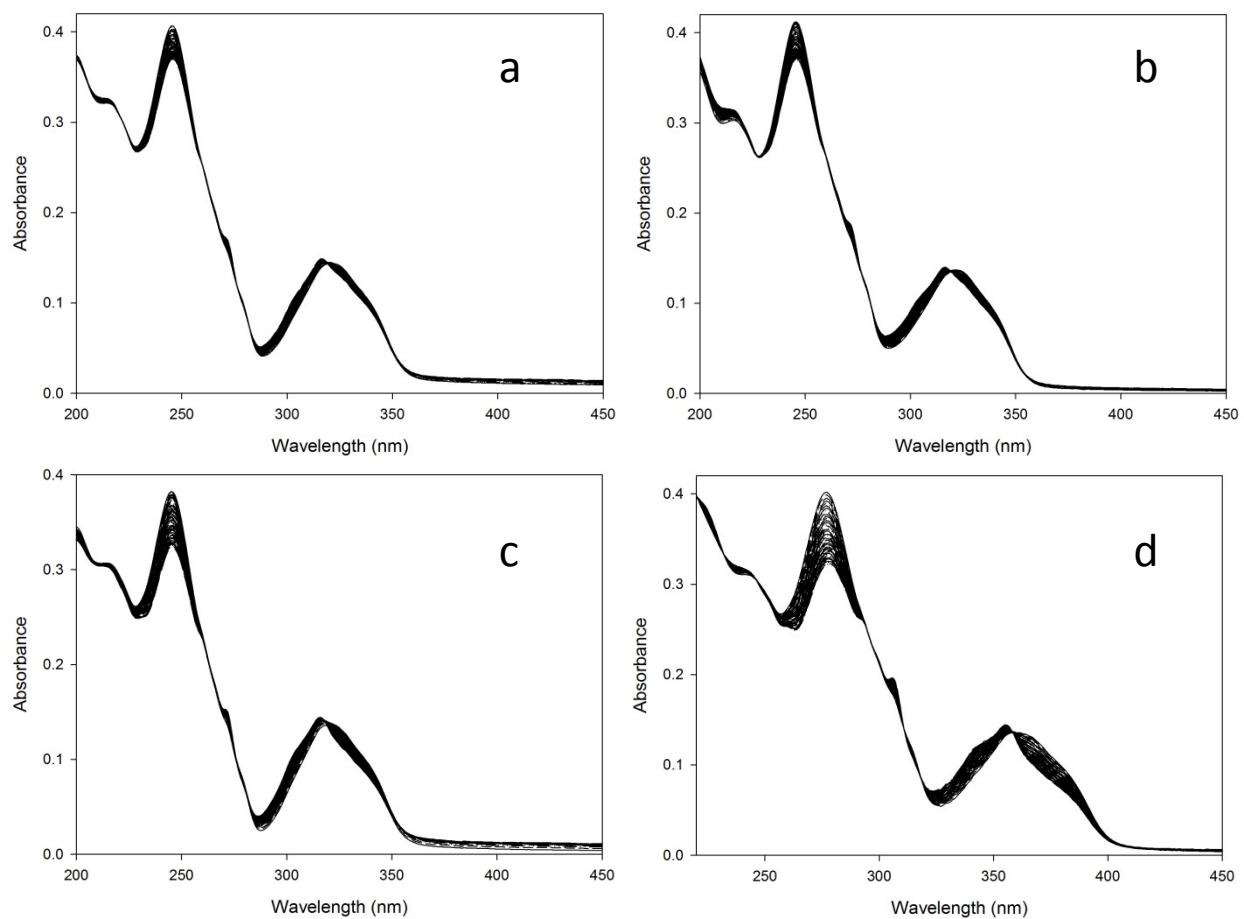

**Figure S25.** UV-Vis absorbance changes as a function of time at 293.1 K when mixing 0.01004 mM [V<sup>IV</sup>O(PIMH)<sub>2</sub>] with (a) 0.005020 mM oxidant, (b) 0.01004 mM oxidant, (c) 0.02008 mM oxidant and (d) 0.03012 mM oxidant.

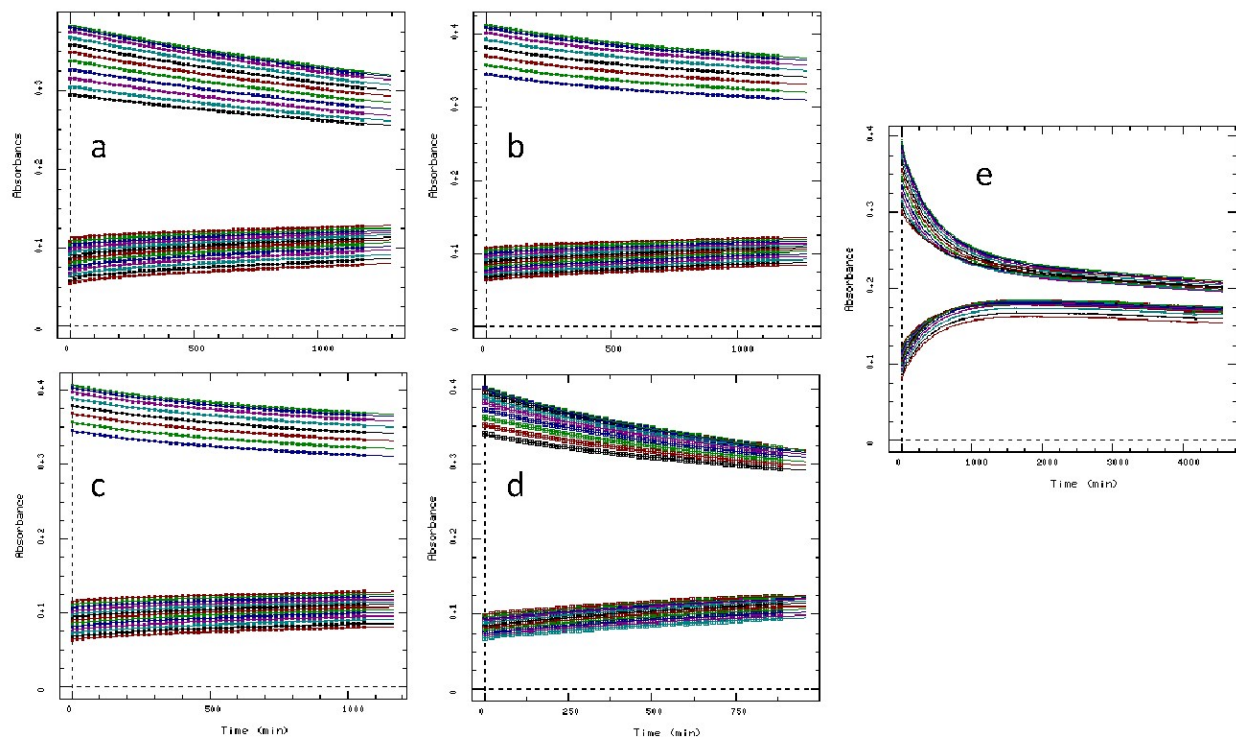

**Figure S26.** Experimental UV-Vis absorbance changes (symbols) and global non-linear least-squares fits (solid lines) for wavelengths in the range of 236-245 and 298-310 nm as a function of time at 293.1 K when mixing 0.01004 mM  $[V^{IV}O(PIMH)_2]$  with (a) 0.005020 mM oxidant, (b) 0.01004 mM oxidant, (c) 0.02008 mM oxidant, (d) 0.03012 mM oxidant and (e) 0.06997 mM oxidant.

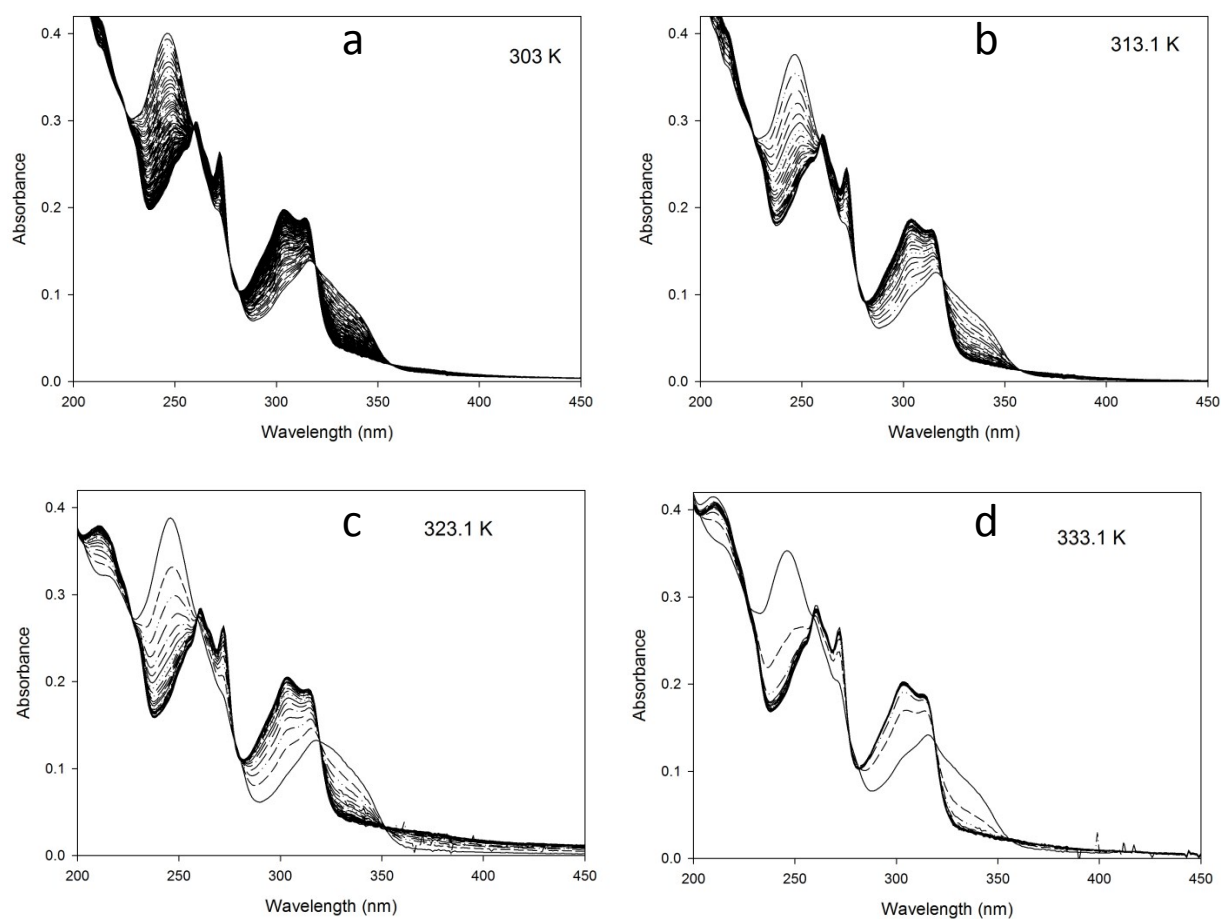

**Figure S27.** UV-Vis absorbance changes as a function of time and temperature when mixing 0.01004 mM  $[V^{IV}O(PIMH)_2]$  with 0.03502 mM oxidant.

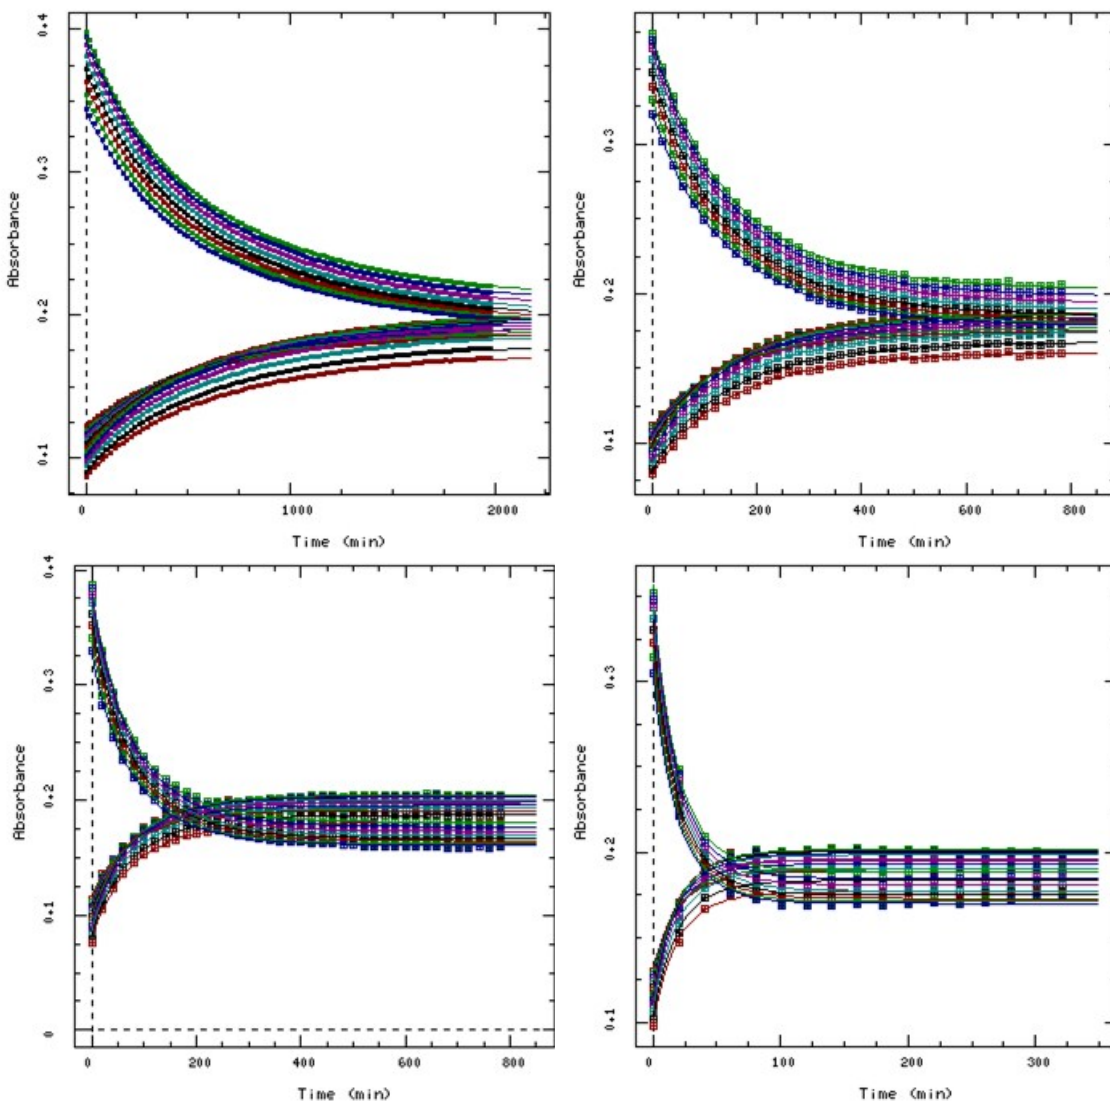

**Figure S28.** Experimental UV-Vis absorbance changes (symbols) and non-linear least-squares fits (solid lines) for wavelengths in the range of 236-245 and 298-310 nm as a function of temperature when mixing 0.01004 mM  $[V^{IV}O(PIMH)_2]$  with 0.03502 mM oxidant where (a) 303.1 K, (b) 313.1 K, (c) 323.1 K and (d) 333.1 K.

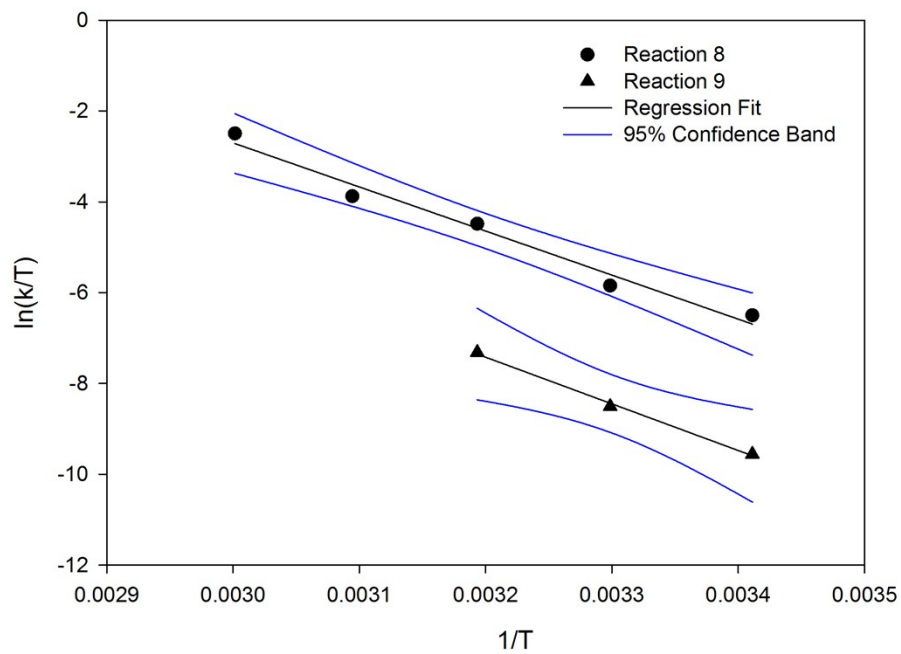

**Figure S29.** Eyring plots for reactions 8 and 9.

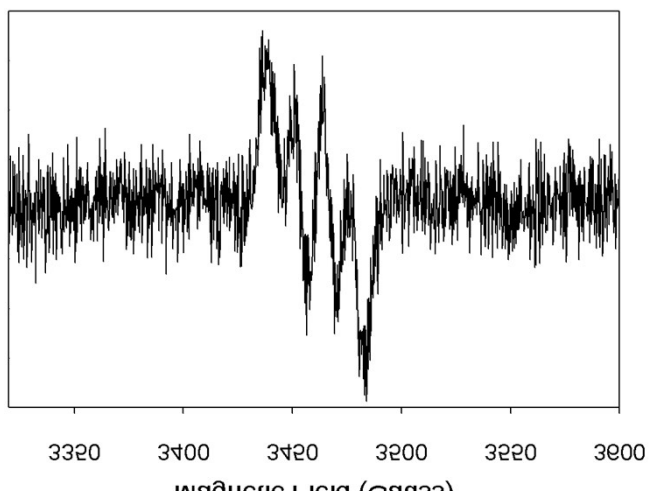

**Figure S30.** EPR spectrum of the DMPO/• free radical species obtained after immediately adding 0.5 mL of 0.100 M DMPO in DMF to 0.500 mL of 0.100 M  $[V^{IV}O(PIMH)_2]$  and mole eq. 0.526 M *t*-BuOOH in DMSO.

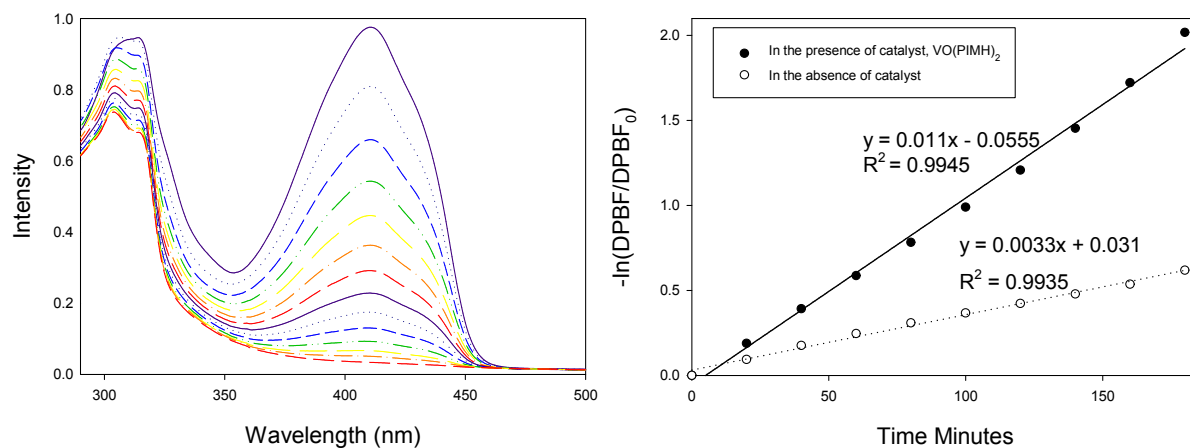

**Figure S31.** (a) UV-Vis spectra for the decomposition of DPBF in the presence and *t*-BuOOH, and (b) the linear plot comparing the decomposition of DPBF in the presence and in the absence of  $[V^{IV}O(PIMH)_2]$ . Concentrations; 12.98 nmol catalyst, 14.8 nmol DPBF and 5.26  $\mu$ mol *t*-BuOOH.

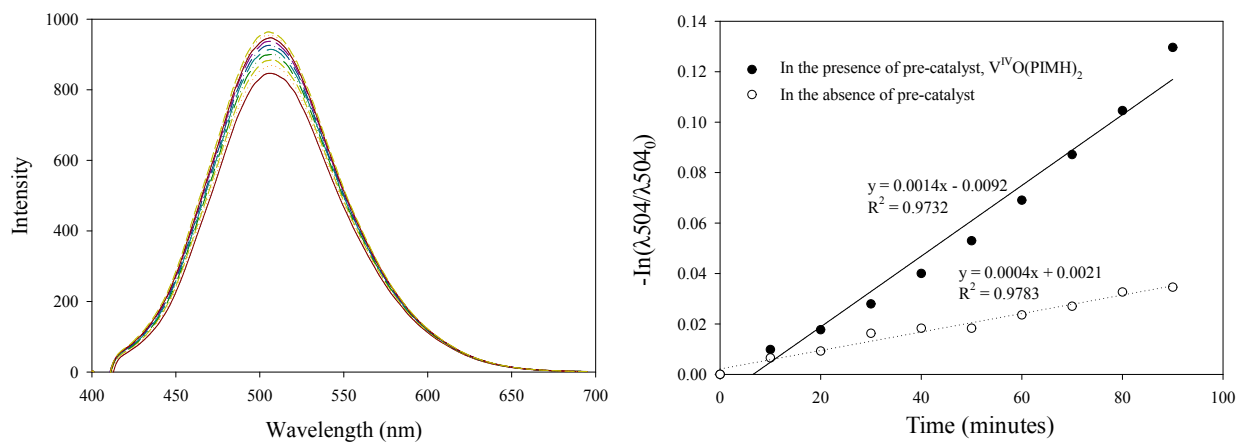

**Figure S32.** (a) Fluorescence spectra collected every 10 minutes upon mixing 3 mL of furfuryl alcohol with  $[V^{IV}O(PIMH)_2]$  and *t*-BuOOH and (b)



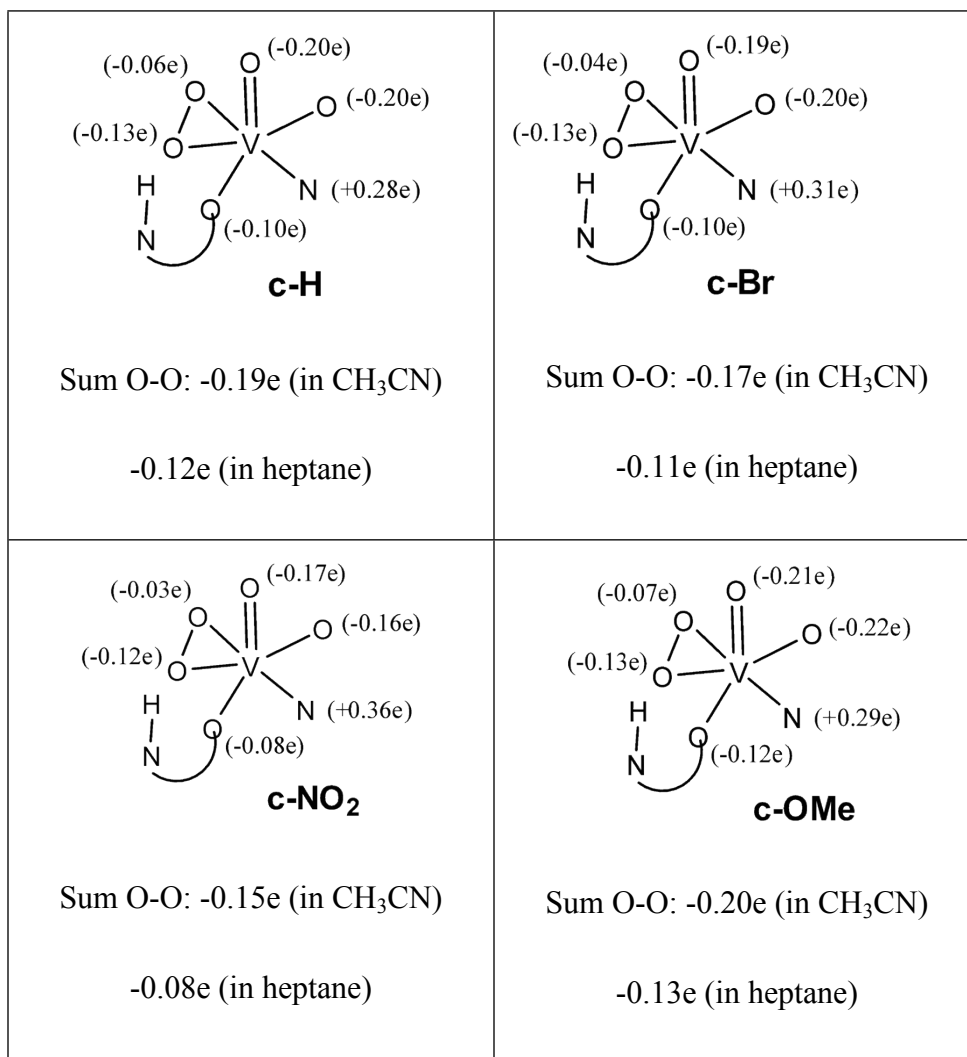

**Figure S33.** Mulliken charges calculated for the donor atoms of the peroxido complexes **c-X** (in CH<sub>3</sub>CN). The trend in reactivity observed cannot be explained from this data. The sum of the Mulliken charges of the two O-peroxido atoms in CH<sub>3</sub>CN and heptane is also indicated.
